# Supplementary material for: Prognostic values of GMPS, PR, CD40, and p21 in ovarian cancer
Source: PeerJ. 2019 Jan 25;7:e6301. doi: 10.7717/peerj.6301 (PMC6348951; doi:10.7717/peerj.6301)
Supplement: Supplemental Information 2 [file peerj-07-6301-s002.xlsx]

## Sheet: MOSE-II vs MOSE-I
Gene name	LOG2FC	adj.P
Drg1	-0.106455	0.7963
Vezf1	0.746095	0.0865492
Nxf7	-0.223433	0.68702
Dbp	1.25145	0.0110233
Gm5105	-0.12181	0.845567
9430041J12Rik	-0.0995299	0.842529
1700065J11Rik	2.07006	0.00153943
Vcl	0.337914	0.414612
Plk2	-1.08854	0.0174222
Zmat4	-0.331721	0.499293
Tbc1d2b	-0.0841158	0.840828
Ensa	0.718608	0.116621
Flot1	-0.0281364	0.945993
Dlx4	-0.0510415	0.948613
Il33	-1.86151	0.00160967
Fbxw17	1.45935	0.00380914
Chek2	-0.430817	0.326108
Bcap29	-0.32483	0.447099
Ccno	1.59158	0.0132228
Fbxl18	-0.688844	0.175588
Dis3l	-0.782914	0.079402
Pcdhb3	-0.0614681	0.919492
Asnsd1	-0.469518	0.271752
Fam108b	-0.666908	0.120097
Cxcl9	-0.163565	0.766192
Kpna1	-0.0376796	0.927931
Cep170b	0.35348	0.39572
Krt14	-2.41706	6.6273e-05
Mc3r	0.117425	0.832521
Vim	0.179514	0.661952
As3mt	0.943852	0.112737
Derl1	-0.01777	0.974562
Per3	0.399994	0.436944
Irf5	1.74795	0.00106043
Unk	-0.0533711	0.900726
Zdhhc9	-0.569705	0.196395
Vwa8	0.614006	0.177048
Anapc7	-0.042677	0.91783
Oas2	0.558755	0.327944
Cyb5	-0.164251	0.689485
Aurkb	-0.760166	0.0843764
Cdca5	-1.02565	0.0243232
Plxdc2	0.0547747	0.923172
Ndst2	0.204075	0.627393
Gfm1	-0.495335	0.25127
Dnajc11	0.274851	0.52553
Zfp637	-0.0723483	0.860368
Nckap1l	-0.104129	0.979242
Ik	0.186052	0.652578
Efna1	0.897705	0.0582815
Kif21a	-0.0391032	0.930405
Ndufa12	0.585114	0.166834
Ccdc130	-0.606699	0.161401
C330013F16Rik	-0.940884	0.0740931
Gmeb2	-0.370952	0.392597
NA	-0.0867596	0.850984
Dip2b	-0.364935	0.390327
Hoxb5	-0.50289	0.288355
Tmco6	-0.111985	0.79196
Fmnl2	-0.351693	0.512751
Esyt3	0.365231	0.412981
Syt2	-0.00630074	0.991546
Lonrf3	1.56804	0.00230207
Dyrk1a	0.728347	0.357041
Eral1	-0.482249	0.27241
Rassf10	-0.327106	0.503306
Prcc	-0.0233627	0.957654
Acot8	-0.268832	0.532372
Vwce	-0.326943	0.475449
Prss16	-0.820676	0.139897
Pitpnc1	0.386964	0.438055
Strip1	0.0617491	0.881146
Crabp1	-2.0237	0.000413996
Efs	0.25355	0.576105
Ranbp10	-0.720261	0.0966429
9130206I24Rik	-0.718812	0.16619
Fut10	-0.536066	0.271567
Dlx3	0.391007	0.793565
Atp5c1	-0.575613	0.324597
Sult4a1	1.36738	0.00960019
Sorbs3	0.374675	0.482534
Lck	0.519763	0.53683
Tmem126a	-0.258773	0.531516
Cdipt	-0.199313	0.66325
Bcl10	0.264557	0.527473
Ap4b1	0.0912158	0.83543
Nckipsd	0.156724	0.731764
Mtmr4	-0.456725	0.286011
Pdgfb	-2.85944	4.45437e-05
Ebi3	-0.0668815	0.904892
Nars2	0.530925	0.272788
Bloc1s4	-0.164653	0.701965
Mmp13	-0.425776	0.385942
Pank4	-1.04517	0.0244584
Tiam1	-0.119855	0.771567
Gpr30	0.0226155	0.960114
Nkap	0.0110996	0.979384
Ttc28	1.52581	0.00448217
LOC101056558|Apol10b	-0.446939	0.424882
Rpa1	-0.18776	0.647751
Ivns1abp	-1.11535	0.0151134
NA	-0.00765199	0.989462
Exosc8	-0.325178	0.43365
Tdeanc2	1.12692	0.0359323
Zbtb3	-0.447689	0.337311
Slc6a6	-1.07719	0.0180407
Phax	-0.218382	0.599916
Bnip3l	0.442055	0.291843
Glt25d1	-0.893343	0.0436055
Tspan33	0.150163	0.729103
Mll3	0.720306	0.104143
Ly6g5b	-0.127478	0.80797
Snx8	-0.429005	0.308478
Fbxo21	-0.245421	0.566437
Zdhhc5	-0.271755	0.549003
Cnn2	-0.0970007	0.813694
Sp2	-0.412222	0.385728
Zfp39	0.0158786	0.97544
Rpf2	0.084701	0.838143
Uhrf2	-0.558439	0.861001
Tubgcp2	0.285777	0.498039
Zswim2	-0.227917	0.656413
Med6	-0.339288	0.421335
Tmem135	-0.0591637	0.912275
Yrdc	0.0382187	0.928148
Tpbg	0.22985	0.622481
Gm22	0.295903	0.719614
Rnase1	-0.248179	0.61623
Lman2	-0.163646	0.691543
Poc1a	-0.444434	0.301229
Epb4.1l5	-0.617325	0.174532
Rbms2	0.72327	0.0931273
Tprn	-0.285211	0.501475
Hspa1l	-0.303117	0.573586
Wdr11	0.319619	0.470868
Pla2g4e	-0.25002	0.679276
Atp10b	-0.215233	0.692542
Slc22a21	0.928063	0.116466
Dicer1	0.319427	0.452373
Cldn6	-0.305931	0.736343
Wdr31	0.426594	0.96275
1700009P17Rik	0.205115	0.679405
Evc2	-0.188143	0.657614
Pop5	-0.576874	0.178838
Gne	0.444444	0.358404
Phf5a	0.0680315	0.868041
Jun	0.581684	0.17651
Ddr2	0.0639014	0.917922
Eif2s2	0.00337705	0.993594
Abcc3	1.61234	0.00400982
Camk1	-0.43482	0.306316
Meig1	-0.0736877	0.902684
Tas2r116	-0.279174	0.557768
Mrpl38	0.299708	0.472165
Cdk19	0.752238	0.0850409
Rasgrf1	-0.0229793	0.963853
Tmx4	-0.575859	0.181725
Ctdspl	0.636502	0.141843
Ivl	2.02911	0.000464407
Ttf2	-0.405403	0.33798
Alkbh3	-0.101515	0.806561
Usp22	-0.255466	0.540212
Mettl9	0.439767	0.305585
Cpeb2	-1.16388	0.036818
Cluh	0.00349389	0.993252
Harbi1	0.0781306	0.879776
Magoh	0.0143675	0.972039
Cd164	0.209078	0.610939
Rsad2	-1.22854	0.0391265
Gns	0.578155	0.17364
Plscr3	0.00210937	0.99661
Pdha1	-0.285702	0.490901
Nrn1	0.981978	0.0333371
Dnajc7	0.143753	0.729313
Fbxw4	-0.0366219	0.935148
Hirip3	-0.0174235	0.966621
Mgat4a	0.0415801	0.936551
Ythdf1	0.166512	0.688402
Mtmr9	-0.757955	0.105887
Dpp7	-0.0292019	0.944509
Krtap13-1	-0.127835	0.823833
AI597479	0.0444305	0.914989
Zfyve19	-0.0984747	0.832672
Zfp266	0.264723	0.523106
Ankrd37	0.629085	0.178743
9930021J03Rik	0.242718	0.600819
Lce1m	0.492184	0.393283
Sec61a1	0.138391	0.735709
Antxr1	0.767377	0.086168
Man2a1	0.641602	0.135016
Slc25a33	-0.231417	0.590524
Cstb	0.549311	0.192943
Tmem147	0.277785	0.500838
1110006O24Rik	-0.430126	0.407664
Sos2	0.377898	0.381449
Eif3l	-0.0430049	0.916732
Zfyve28	-0.152317	0.777974
Chrnb3	-0.413866	0.343008
Ltv1	0.342963	0.414481
F2r	-2.24046	0.000132689
Osbpl9	0.177157	0.770909
Agpat3	-0.265769	0.539243
Dmd	-0.169095	0.708621
Pim3	0.713585	0.0984852
Necap2	0.509816	0.234989
Stk11ip	-0.00231683	0.998074
Gpr142	0.0541333	0.926656
Slc25a24	-0.613355	0.156768
Mycbp2	-0.0744958	0.866137
Cntnap5b	-0.0806404	0.900186
Matn2	1.82594	0.00321221
Frg1	-0.384813	0.36723
Tmem86a	1.33046	0.00791588
Mapk8	0.873491	0.0598952
Tmc6	0.246263	0.556895
Pik3cb	-0.832973	0.0716799
Alg9	-0.686613	0.124057
Rem2	0.209655	0.696106
Epg5	0.0742627	0.870993
Sprn	-0.135013	0.78323
Cog6	-0.048152	0.908539
Narf	-0.00535118	0.99021
2310010J17Rik	0.409559	0.395915
Nek4	0.617241	0.277733
Six5	0.602672	0.194842
Mrpl2	-0.107408	0.794531
Zfand6	0.345673	0.407305
Hdac11	0.591703	0.229805
Il15ra	0.0121243	0.99949
Iqgap1	-0.55652	0.196901
Ddx41	-0.180799	0.667433
Phb2	-0.305726	0.459973
Pawr	0.866554	0.0494827
Ephb4	0.210493	0.619184
Ppp1r16a	0.281593	0.52727
BC068157	1.30563	0.0558494
Snx13	0.447946	0.297128
Fbxl14	0.0831849	0.871144
Pcsk6	-0.00576985	0.98883
Skiv2l2	-0.449125	0.284325
Fam210b	-0.301752	0.491529
Tubd1	0.342555	0.516169
Plod3	-0.129497	0.753857
Wbscr22	0.0265246	0.949428
Lgals8	0.891038	0.0504466
Gpr65	-0.0537913	0.92468
Stac3	0.951359	0.112075
Ubac2	0.0505977	0.903999
Olfr223	0.030889	0.955065
Commd2	0.0564925	0.908606
Pus7l	-0.142221	0.73665
Rapgef5	-1.04675	0.0685167
4930430F08Rik	0.428204	0.337015
Zfp362	0.770044	0.089502
Pla2g15	-0.515458	0.229155
Lhx2	-0.423905	0.351223
Dgka	0.780189	0.0853455
Sectm1b	-0.122348	0.802743
Rassf2	-0.449384	0.45749
Snx18	-0.742403	0.0875285
Nme7	0.525205	0.268957
Itga3	-0.240858	0.559258
Arf3	0.335028	0.419822
Kctd2	0.351234	0.400785
Kctd15	-0.546957	0.226367
Pitpna	0.744234	0.0886227
4931406P16Rik	0.438607	0.29973
Cpt2	0.497407	0.243676
Sipa1l3	-0.189781	0.693741
Fam122b	0.450412	0.324592
Casc5	-1.0041	0.0304852
Mapkapk2	1.42695	0.00340678
Snx14	0.190523	0.64724
Hook3	-0.385375	0.372654
Neu2	0.912917	0.0573242
Sec22b	0.0702584	0.902377
Prdx3	0.0117166	0.982491
Sms	-0.770829	0.313091
Asf1a	0.533902	0.252302
Rasd1	1.04149	0.0658263
Ddx58	1.75817	0.00319598
C3	0.644858	0.138762
Ctxn1	-1.69369	0.0013034
Polr3g	-0.00499062	0.990934
Mnt	-0.0403428	0.934591
Bcl2	-0.109557	0.906352
2010012O05Rik	0.313363	0.559051
Zfp418	-0.0864028	0.871301
Pigyl	-0.0865567	0.834458
Nfib	0.863114	0.0503266
Ddx47	-0.118954	0.779032
Tmbim6	0.165479	0.687761
Prkacb	0.0545505	0.89485
B3galt4	0.309819	0.545924
Slk	-0.295618	0.771323
D430042O09Rik	0.844071	0.0668548
Cyth2	-0.0756367	0.893707
Lztr1	0.00243271	0.99538
Ndufb11	-0.467282	0.290713
Arl16	0.280642	0.505339
4930417O13Rik	-0.0309574	0.956852
Murc	0.21848	0.699827
Gm9734	-0.01777	0.994505
Igfbp7	1.72187	0.000893158
Cenpl	-0.7598	0.0934543
Mapk14	-0.0074855	0.985494
AI464131	0.235865	0.614644
Wdr34	0.538374	0.235332
Jag1	-0.59713	0.201877
Asb14	-0.0987504	0.948864
Pcyt1a	0.284286	0.509652
Cxxc1	0.147058	0.721838
Smpd1	0.133287	0.75969
Pin1	-0.717507	0.119884
Maff	0.948855	0.0389292
Lemd2	0.272364	0.542042
Racgap1	-0.428401	0.336767
Taf12	0.400329	0.356067
Rars	0.304461	0.468645
Ndufa1	0.504486	0.229721
Ddah1	0.325854	0.451678
Pllp	-0.0640941	0.917452
Slc20a1	-1.47816	0.00695905
Ppp1r18	0.0871172	0.835203
Mrps9	-0.362579	0.42667
Ank	-0.891739	0.0866498
Blvrb	0.46551	0.272599
Prph	-0.528987	0.208419
Xrcc2	-0.416367	0.342904
Pirt	-0.29491	0.55414
Asns	-0.589349	0.163735
Mrpl16	-0.759331	0.080099
Lrrc72	-0.215932	0.729165
Rnft2	0.157575	0.722867
Eng	0.282456	0.567062
Ttyh2	0.257505	0.540456
4921531C22Rik	0.563016	0.267795
Socs5	1.58709	0.00285376
Bhlhb9	-0.042478	0.918385
Aifm1	0.0877022	0.831945
Sdsl	0.178248	0.6855
Gle1	-0.287005	0.504698
Dhx32	0.215823	0.610022
Ssr1	0.0781619	0.855271
2510003E04Rik	0.917742	0.0419533
Triqk	0.498268	0.307874
Fkbp11	0.430615	0.307155
Ddt	0.845928	0.0546048
Zfp259	-0.568871	0.218261
Ociad1	-0.0101868	0.980265
Rgs11	1.52254	0.00346591
Mpp6	-0.468224	0.286842
Prr14	0.444053	0.289315
Artn	0.518434	0.292902
Fchsd2	1.11842	0.0221893
Nid1	1.33353	0.0175633
Ndufs8	-0.79368	0.0711759
Ccdc22	-0.409529	0.342251
Golph3l	0.241351	0.570942
Entpd3	-0.0579907	0.910845
Cwc25	0.101672	0.81614
Zfp800	-0.299429	0.528103
Zswim1	-0.240949	0.584311
Mpg	0.44265	0.416146
Bbs7	0.378703	0.396238
Tfe3	0.432674	0.307718
Dpysl5	-2.3285	0.000124482
Ankk1	-0.135069	0.795899
D0H4S114	-3.73926	5.56126e-06
Ndufaf1	-0.197079	0.639516
Trim44	-0.342099	0.412973
Snca	0.798677	0.117355
Cdr2l	-0.846806	0.054506
Vamp4	0.265829	0.560268
Camk2n2	-1.22347	0.0142793
Rec8	-0.0775385	0.899549
Ampd3	-0.283931	0.512392
Cc2d1b	0.264972	0.536858
Exoc7	0.302411	0.468541
Tceal7	-0.126155	0.83347
Eqtn	0.0325548	0.9502
Tmem128	-0.286416	0.493762
2310044G17Rik	0.325683	0.455186
Medag	1.21866	0.0142932
Mgrn1	0.48679	0.247429
Spryd7	-0.367583	0.377405
Svs2	-0.0862423	0.865929
Uck2	-0.464271	0.274563
Mfge8	-0.832248	0.0596565
Stat5a	0.88594	0.0889191
Rwdd2b	-0.188183	0.672033
Ttc27	-0.560579	0.203354
Pop7	-0.254285	0.56031
Ccdc92	-0.180037	0.666402
Kprp	-0.0899831	0.863759
Ddx19b	-0.992129	0.0366811
Dusp28	-0.594478	0.200814
Cst9	-2.81166	7.88334e-05
Parn	-0.00343755	0.993483
B4galnt1	2.00574	0.00125344
Specc1l	0.434084	0.298842
Pds5b	-0.172716	0.692814
Mon1b	-1.1073	0.0203762
Dennd2a	0.389068	0.361171
Eml2	1.08111	0.0295051
Ddx28	-0.735722	0.108732
Rpl37	-0.193918	0.796826
NA	-0.250358	0.579867
Ipo5	-0.534346	0.207967
Prss23	-0.983812	0.0316546
Ripk4	0.229379	0.606686
Gpr44	-0.0762987	0.876085
Ahi1	1.89604	0.00069998
Ccdc129	-0.154169	0.797822
Nfatc1	-0.341938	0.473707
A730017C20Rik	0.957987	0.0879753
Gda	-0.0126289	0.979169
Mfsd3	0.257176	0.55264
D5Ertd579e	0.633673	0.146048
Ift74	0.53257	0.318724
Slc44a4	-0.304856	0.53519
Dnajc12	0.666576	0.137135
Tmem173	0.0293238	0.944394
Fhod1	-0.407568	0.349495
Aplp1	-1.41684	0.00381973
Xylb	-0.481682	0.381001
Med11	-0.0807256	0.847037
Pde6g	-0.273158	0.958158
Hnf1b	-0.0959842	0.843288
Cnot4	-0.0237215	0.954893
Dpp6	0.101615	0.865634
Ppp1r8	-0.208405	0.618528
Ddah2	0.149156	0.717534
Rbmx	0.81935	0.0888471
Prkcz	0.368383	0.396701
Ahrr	0.88709	0.0977923
Tpp1	0.585966	0.200077
Casp7	0.26703	0.564795
5730403I07Rik	0.257257	0.635636
Cops8	-0.0998317	0.809483
Pnrc2	0.370389	0.377483
Xkr5	-1.22395	0.0153732
Ankrd13a	0.201917	0.624669
Ankrd10	-1.10975	0.015735
Rev1	0.602043	0.309799
Fam46a	-0.231789	0.637674
Ccdc178	-0.275937	0.600904
Dhfr	0.417309	0.381965
Nme4	-0.195145	0.640653
Dnajc28	0.370876	0.443241
Fnbp1	0.306446	0.493357
Siah1a	-0.400322	0.354345
Slc35b1	0.297788	0.470646
1810030O07Rik	0.0307296	0.943149
Otop2	0.228709	0.931278
Akip1	0.24324	0.576037
Krtcap2	0.0907324	0.825071
Psmd4	0.230642	0.57529
Pygm	-0.0682507	0.882309
Fggy	0.82089	0.0704601
Dbnl	0.445228	0.29345
Rfx5	0.374581	0.37592
Lhfpl3	-0.2438	0.689458
Cysltr1	2.44788	0.000318274
Ly9	-0.168413	0.701361
Cnpy4	0.0445762	0.919921
Axin2	0.27605	0.56566
Gpr22	0.0122516	0.980714
Oma1	1.10178	0.0183196
Fkbp7	0.243232	0.55699
Snx33	0.141577	0.747834
Hdac2	0.301669	0.466408
Napa	0.165643	0.706125
Rrnad1	0.59108	0.197405
Tfg	0.267742	0.516637
Svip	0.194069	0.670232
Slc25a37	0.127295	0.764822
Ggact	-0.0620465	0.886594
Atg10	0.370084	0.400552
Ptpn18	-0.566363	0.27186
Inpp1	-0.622937	0.166224
Slc35g3	0.0374429	0.938105
Klrg2	-1.06265	0.0291935
Add1	-0.00821739	0.984079
Gm21949|Schip1	0.310657	0.478149
Ccdc136	0.647053	0.142578
Cdk5	0.378403	0.390331
Ptk7	1.31236	0.00685077
C8b	0.105326	0.801776
Gas8	-0.161702	0.699269
Tnfsf11	-0.335613	0.44751
Cenpp	-0.501263	0.241401
Cyb5b	-1.09578	0.0163985
Wipf3	-0.81713	0.110817
Olfr1155	0.0158281	0.973364
Id2	1.56377	0.00184133
Aggf1	0.352179	0.482671
Lars2	0.135657	0.766464
Adam11	-0.127295	0.778648
Krtcap3	0.474193	0.30118
Zranb2	0.158009	0.702785
H6pd	0.46599	0.277856
Slc12a7	0.0972947	0.820191
Msn	-0.891509	0.0430756
Nisch	-0.190667	0.643083
Gtpbp3|LOC100862531	-0.730905	0.105558
Prss46	-0.531006	0.513761
Atxn7	0.0564322	0.894813
Tax1bp1	0.519519	0.21815
Stk17b	-0.438727	0.355919
Plxnb1	-0.220172	0.616627
Ercc1	0.47127	0.26529
Setd5	-0.362109	0.394966
Stab1	-0.709535	0.225994
2810428I15Rik	-0.736158	0.0884021
Snapin	0.584239	0.218672
Znrd1	-0.0319008	0.938184
Baz1a	-0.566708	0.203211
Pnpla6	-0.663705	0.123867
Ypel1	0.185272	0.675674
Guca1a	0.876026	0.0669305
Psmd13	-0.122117	0.765981
Drd1a	-0.00329835	0.996001
Eif3f	0.123213	0.763428
Sult1c2	-0.169657	0.78575
Mpzl2	-0.157589	0.702821
Pigm	0.161887	0.724715
2010003K11Rik	0.0265638	0.963214
Dvl2	-0.0292551	0.950033
Fam174b	0.0648245	0.986488
Tacr1	-0.0825319	0.881195
C030016D13Rik	0.488458	0.55107
Sept8	-0.230099	0.604677
Gpr63	-0.447106	0.393011
Sf3a3	-0.119768	0.771678
Retsat	0.792188	0.0740298
D3Ertd254e	0.413289	0.850554
Emg1	-0.0910209	0.82415
Figla	-0.0260175	0.961304
Nudt6	0.178869	0.691867
Chchd7	0.457921	0.276793
Mfsd6	-0.893349	0.449457
Dlat	0.145218	0.756092
Wbp5	-0.551966	0.190219
Mettl21a	0.608694	0.200461
Nob1	-1.22897	0.0207303
Cst10	-0.0430867	0.973965
Fam117b	-0.195792	0.65623
Arpc2	0.285707	0.487904
Rhod	0.00315089	0.994016
Ftcd	0.331249	0.561999
Ccdc25	-0.330543	0.430404
Thnsl2	0.470558	0.727021
Pdzrn3	0.25362	0.59478
Lrrc41	0.921462	0.0382421
Insc	-0.333946	0.539436
Ncoa6	-0.305021	0.51457
Bub3	-0.259748	0.541628
Elp6	-0.0348664	0.939392
Adamts15	0.211353	0.64832
Klc2	-0.467304	0.389804
Magee1	0.31252	0.461815
Nphp4	1.07751	0.0369996
2610015P09Rik	0.747397	0.216486
Rab11fip1	0.346217	0.47034
Radil	-0.605078	0.298864
Wnt5a	-0.20058	0.64915
Hebp1	-0.492841	0.294656
Cox5a	-0.134166	0.743237
Fjx1	-0.141575	0.80923
Egfem1	-0.0713526	0.896492
NA	0.0108173	0.98697
Adamts10	0.191809	0.646415
Ykt6	-0.126163	0.759456
Smc2	-0.436047	0.305078
Lpgat1	0.434141	0.328982
Rbm43	0.896752	0.0491592
Dnajb5	0.0630662	0.887465
Laptm5	0.0662487	0.907232
Med4	-0.539429	0.206634
Mras	-0.796082	0.0682184
Cyp46a1	-0.224928	0.60537
Ptbp1	0.031751	0.938232
Cog2	-0.611292	0.158603
Bend6	-0.659541	0.179993
Ankzf1	0.155557	0.718312
Rfc4	-0.639299	0.139156
Gosr1	-0.200333	0.655216
Nudt5	-0.630002	0.14324
Ugp2	0.00110336	0.997948
Lgals1	-0.0338499	0.933958
Polr2k	-0.238813	0.624435
Ctsz	0.166004	0.689196
Lzic	0.324322	0.493743
4833420G17Rik	0.169898	0.683931
Xirp1	0.00585221	0.991754
4933426M11Rik	0.759781	0.0859372
Crabp2	0.489067	0.266287
Mrpl35	-0.311245	0.571438
Trim32	0.374858	0.409272
Vps36	-1.34567	0.00548207
Ticam1	-0.0762019	0.881999
Wwtr1	-0.0569827	0.889305
Otof	0.026564	0.966914
LOC101055917	-0.559963	0.240934
Ky	-0.0958678	0.856454
Traip	-0.156168	0.737463
Lyar	-0.691938	0.115609
Rdbp	0.0794928	0.848677
Cyp2c55	-0.149746	0.748385
S100a5	0.00978728	0.992466
Cuta	-0.0248512	0.951776
Fndc3b	-0.458005	0.275088
N6amt2	-0.115703	0.781027
Mylk2	0.0296697	0.980861
2610002J02Rik	-0.0378703	0.927995
Tacc2	0.690515	0.109837
Bap1	-0.558083	0.190879
Pdia6	0.0491571	0.90622
Mplkip	0.286014	0.506225
Tmed1	-0.855483	0.0537475
Mtx1	-0.13562	0.74117
Med17	-0.107514	0.847754
Bcs1l	0.026605	0.948928
Eras	-0.546272	0.311744
Angpt2	-0.273987	0.597362
Tnfrsf18	0.856838	0.133755
Naa30	-0.155388	0.71881
0610040B10Rik	0.816089	0.202748
March5	0.229104	0.608687
Mvb12a	-0.68518	0.110301
Panx3	-0.130025	0.790913
Alg6	-0.203301	0.628385
Ank2	-0.469993	0.312805
Sgsm2	0.488042	0.289173
Phf2	0.018255	0.967193
Tab2	1.03739	0.0244137
Tmem57	0.401912	0.337379
E130012A19Rik	-0.425596	0.335704
Gclc	0.344023	0.46015
Gchfr	-0.414247	0.333252
Eif2s1	0.260073	0.535944
5330417H12Rik	-0.532508	0.227065
Araf	0.304952	0.470202
Polr2j	-0.116451	0.777447
Sp1	0.0530326	0.898454
Med26	-0.681939	0.120972
Cnga2	-0.222006	0.751029
Ncapd3	-0.791308	0.147811
Insr	-0.185181	0.660382
Ctage5	0.286926	0.490768
Slc12a3	-0.307388	0.561049
Kcna7	0.158964	0.753879
Capg	2.0932	0.000451666
Slc5a7	-0.356282	0.499175
Xdh	3.53582	7.49662e-06
Tmem159	0.799437	0.0801952
Psors1c2	-0.430379	0.385144
Prcp	0.202428	0.640344
Myo9b	-0.66992	0.128656
3110001D03Rik	0.601204	0.159419
Mettl10	0.394184	0.467191
3110043O21Rik	0.536178	0.238699
Huwe1	-0.266384	0.519855
Nfkb2	0.232095	0.58872
Bmp8a	-0.927771	0.0908202
Nedd8	0.0180675	0.964756
Dok4	0.404242	0.348446
Tfr2	-0.163767	0.752379
Mre11a	-1.05249	0.0224659
Syap1	-0.183727	0.664503
Ppil3	-0.0768696	0.855239
Plcxd3	-0.577228	0.193474
Crnkl1	-0.086498	0.867289
Dtnb	0.371354	0.37725
Lass4	0.725476	0.149591
9930012K11Rik	-0.0191582	0.965752
Grtp1	-1.32186	0.00775937
1700020L24Rik	-0.257635	0.62494
Fam185a	-0.069036	0.872357
Mavs	0.00543284	0.989832
Atp5sl	0.620313	0.154553
Ndrg2	1.52432	0.00214477
Adamts1	-2.0142	0.000473106
Slc1a7	-0.417788	0.47982
Tep1	0.00778935	0.985696
Sec31a	-0.124521	0.762069
Pitpnb	-0.311822	0.45204
Arih1	0.57837	0.182594
Syn1	-1.26439	0.0142336
Myct1	0.121225	0.819581
Agpat5	-0.79016	0.0894547
Slc22a4	1.07466	0.0480953
Ifngr1	0.370088	0.409287
NA	0.354648	0.409431
Letmd1	-0.175073	0.682655
Dnajc1	0.445805	0.300778
Aarsd1	-0.519124	0.230512
Dom3z	-0.0100141	0.981488
Pptc7	-0.0778102	0.857075
Svs3b	-0.39828	0.360671
Nkrf	-0.707873	0.233548
Sf1	-0.264513	0.526442
Yaf2	0.0131252	0.977257
Mapkbp1	0.258709	0.573872
Atp13a1	-0.873492	0.0490405
Cdca3	-0.71625	0.0979668
Supt3	-0.218385	0.60863
Foxi1	-0.114376	0.796406
Hoxc13	-0.560613	0.217837
Sepn1	0.20764	0.615743
Mark1	-0.0809846	0.892884
Pear1	-0.723068	0.106743
Syngr1	0.867583	0.0843446
Mmgt1	-0.554763	0.192344
Tmem87a	-0.24941	0.552545
Slx4ip	-0.0341903	0.957985
Htra1	-0.021821	0.957895
Gpr37l1	-0.159041	0.740921
Tuft1	-0.230126	0.58287
Tspan8	-1.19028	0.0109138
Fbf1	0.632867	0.154517
Kbtbd2	0.106326	0.799235
Dennd4a	-0.18424	0.676069
Dda1	-0.718928	0.0956942
Hapln4	-1.40757	0.00535811
Epb4.1l1	-0.250439	0.559707
Ust	0.906583	0.0456193
Bcl2l12	0.347895	0.407565
Pdgfra	-0.0145968	0.972077
Homer3	-0.505938	0.251198
Cdc7	-0.892093	0.0464569
March6	0.230312	0.602459
Ralb	-0.151287	0.717171
Krt26	-0.598053	0.332693
Dnajc15	0.548948	0.19463
Scap	0.57146	0.177107
Zfp574	-0.00754955	0.985683
Fam46b	-0.776174	0.129582
Minos1	1.5352	0.00505455
Hap1	-0.0308876	0.940559
Dram1	-1.10915	0.0233295
Gmip	-1.01649	0.0296054
2310047K21Rik	-0.249889	0.584004
Mak	0.340191	0.521229
Gm3336	-0.0924874	0.86365
Cby1	0.189211	0.657661
Senp2	-0.0677774	0.899588
Ptprz1	0.385542	0.42548
Clec16a	0.23154	0.605138
A630001G21Rik	0.939791	0.0533166
Alox12e	-0.0306881	0.953937
Tmco7	-0.23968	0.615435
Chst5	-0.759449	0.11955
Tmem65	-0.316705	0.486249
Srek1	0.115039	0.790177
Syt12	-0.744357	0.17903
Dhrs1	0.29903	0.471383
Med16	0.748358	0.0868565
Ppan	-0.663313	0.120544
Olfr2	-0.329193	0.603086
Gpr19	-0.498223	0.257648
Yipf2	0.399528	0.346058
Arntl	0.643323	0.156168
AI837181	0.148067	0.719929
Rab40c	0.114185	0.782603
Car12	1.11525	0.0153237
Wibg	0.0255429	0.994715
Rps5	-0.0338278	0.934001
Helq	-0.521944	0.234713
Rp1l1	-0.257706	0.539324
Mvp	0.650408	0.134428
Zfp277	0.34926	0.469578
Phtf2	0.0265753	0.949186
Ghr	2.22788	0.000137364
Asb1	0.433698	0.317414
Ms4a10	0.234517	0.692551
Ppa1	0.0931441	0.820025
Abcc10	0.082674	0.847814
Wnt2	0.640471	0.198831
Ppp3cc	0.488114	0.269476
Dmxl1	-0.0306446	0.957527
Pdpn	0.674299	0.114382
Nipsnap1	-1.06594	0.0230834
Lonp2	-0.0991003	0.812414
Glyctk	0.00990651	0.991492
Bscl2	0.373814	0.368032
Skil	-0.454127	0.285649
Mfsd8	0.370928	0.462748
Gip	-0.0868196	0.855977
Rpa2	0.0306092	0.941594
Dis3	-0.648771	0.135493
Tusc2	0.382078	0.38357
Ap1ar	-0.256211	0.536611
Psme3	-0.734556	0.0938113
Lgals9	-1.20128	0.011945
Trim29	-0.00292624	0.995255
Pan2	0.0390022	0.928585
Ptges3l	1.22027	0.0120079
Ttpa	0.439547	0.3505
Fh1	-0.201495	0.625305
Kif22	-0.796859	0.0687975
Polrmt	0.522104	0.219851
Man1a	3.03161	4.49766e-05
Gsto1	-0.488564	0.243702
Prr14l	-0.000484384	0.999123
NA	-0.229232	0.818836
Qrsl1	0.148839	0.720105
Cog3	0.091364	0.826439
Cst6	-0.273511	0.571638
Eps15l1	-0.311462	0.456893
Gdf5	-0.0525377	0.918001
Mutyh	-0.439162	0.326111
Il11	-0.646128	0.201129
Trap1	0.148976	0.718442
Mtx3	0.545334	0.237273
Osr2	-0.419116	0.439726
Uhrf1bp1l	0.531694	0.212762
Azi1	0.395083	0.356261
Pif1	-1.41341	0.00588317
Ints12	0.125105	0.790701
Prmt3	-0.220043	0.594987
Pgc	0.146398	0.763033
Grn	0.00426488	0.991727
Psmd10	-0.229947	0.583503
Synb	0.171808	0.76825
Bst1	3.03514	3.88317e-05
Zranb3	-0.109875	0.795868
Cdnf	0.356909	0.559454
Tapbpl	0.582346	0.225202
Pfn2	0.625315	0.145217
C2cd4b	-0.0143722	0.98061
Snapc1	0.0521861	0.92168
Man1a2	0.508482	0.262181
Slc39a10	0.580958	0.177725
Pcyt1b	-0.62033	0.154163
Ap3m1	0.0603005	0.88956
Upf3b	0.00711797	0.987689
Itpkc	0.41598	0.345767
Tmprss5	-0.0470179	0.913861
Rcan2	1.53896	0.00285167
Tbccd1	0.179278	0.684036
Aaas	0.00697883	0.986424
A930033H14Rik	2.08493	0.00106539
Mfsd1	0.162115	0.694871
Plekhb1	1.40877	0.00371071
Cpz	1.30738	0.00659928
Scnn1a	-0.291224	0.508521
Taf1	-0.171242	0.725866
Loxl2	0.0355875	0.930619
Fn1	1.15765	0.0120028
Rab15	-0.530301	0.239568
Ogn	1.5812	0.0128059
Flcn	0.0288758	0.944547
Sqle	-1.07855	0.0192011
Kif4	-0.691283	0.631228
Hoxc8	0.289212	0.492821
Ulk1	0.417236	0.325104
Gins4	-1.00913	0.0249959
Ccdc17	1.75089	0.00384608
Klhl21	0.485185	0.2614
Polr3gl	1.166	0.0169239
Dmkn	0.963456	0.0724468
Ms4a8a	-0.616621	0.273221
Rab1	0.134121	0.746183
Ccs	0.150985	0.715047
Wnt11	-1.50493	0.00983468
Exo1	0.280301	0.59599
Parp16	-0.574382	0.198998
Fhl1	-1.84524	0.000522614
Smad2	-0.609616	0.167694
Rdh7	-0.145997	0.81048
Slc25a11	0.544497	0.197876
Mrpl9	-0.0562292	0.894094
Tbp	-0.201646	0.632204
Syngr3	-1.491	0.00770894
Adar	0.223545	0.598681
Mettl3	-0.348391	0.416643
Ibtk	0.33635	0.425927
Ctf1	0.312922	0.455795
Atoh8	0.192349	0.648225
P2ry13	-0.329989	0.523014
Eef1e1	-0.430677	0.316452
Wdr1	-0.14973	0.715251
Nup98	0.576385	0.275001
Orc6	-0.834938	0.0576432
Gpha2	-0.126833	0.817086
Grb7	-1.01125	0.0616022
Ift43	0.371322	0.38251
Abhd15	-0.385957	0.86815
Zcchc7	0.643127	0.183399
Slc39a6	0.349351	0.40079
Dnahc1	-0.0341903	0.9559
Plekhh1	-0.41562	0.342389
Lsm1	-0.423589	0.325431
Usp5	-0.300462	0.472385
Lsm14a	0.119709	0.771821
Rraga	0.473748	0.258937
Flnb	-0.987855	0.027409
Clpp	0.0256555	0.950517
Acap3	0.527625	0.278049
Srp9	0.284587	0.499916
Ctps2	0.154905	0.797893
Trim69	0.0448905	0.939655
Tnpo3	-0.0952443	0.818453
Tab1	0.0773642	0.851501
Wrb	-0.539059	0.219627
Ssu2	-0.524051	0.291686
Tagln3	0.00564031	0.990294
Med22	-0.287851	0.493432
Klc4	0.216124	0.61644
Ythdf2	0.165185	0.77852
Cutc	0.0127827	0.976173
Rfxank	-0.599691	0.204592
Rab25	0.269906	0.737852
Slc24a3	-0.674672	0.186109
Cyp2f2	-0.285213	0.523367
Olfr578	-0.37837	0.670043
Spint1	2.41101	0.000120069
Cdip1	0.0993324	0.830182
Ttl	0.168608	0.688321
C2cd5	0.495066	0.415302
Sepp1	0.919288	0.0379274
Egf	0.664603	0.213099
Fbxo46	0.165158	0.704009
Taar1	-0.287401	0.576052
Zfp160	0.21318	0.617892
Gjb5	0.2615	0.638185
Vac14	-1.47023	0.00344812
Ctu1	0.163194	0.710978
Canx	0.319153	0.452233
Odf3b	-0.402758	0.391326
Smtnl2	-0.469796	0.273216
Mlf1ip	-0.743521	0.103511
Gpr180	0.488437	0.340788
Epha2	-0.358104	0.408979
Flt4	-0.388997	0.531028
1810014B01Rik	1.231	0.0233301
Atp5s	0.413306	0.338818
Tex19.2	-0.316856	0.533916
Ergic2	0.290416	0.512834
Timm17a	-0.328205	0.431803
Nkx2-3	-3.39217	1.69288e-05
Tns4	0.418001	0.387733
2310033P09Rik	0.587095	0.202414
Rab28	0.226033	0.653415
Abt1	-0.0508372	0.914921
Fam195a	0.590947	0.172288
1810011O10Rik	-2.08247	0.00361305
Mpp7	0.0539706	0.899647
Srsf6	0.185092	0.652644
Slc29a2	-0.308447	0.486578
Grb10	0.0901696	0.843594
Jph4	-0.295697	0.588305
Adc	1.9486	0.0012669
Rassf7	-0.238645	0.590879
Pak1ip1	-0.242862	0.574444
Rhbdf1	0.371154	0.375207
Gipc2	0.867151	0.115803
Sirt1	0.567788	0.235412
Fyttd1	0.502929	0.445383
Usp8	0.151384	0.718945
Eefsec	0.0655733	0.883848
Sdr39u1	0.191255	0.64326
Ppp1r35	0.0509817	0.903906
Sec23a	-0.282667	0.49905
Vat1l	-2.98527	1.51966e-05
Hs2st1	0.102518	0.819908
Chac2	-0.537366	0.246065
Cyp19a1	-0.833199	0.0985044
Ifrd2	-0.732242	0.104269
Rab33b	0.229349	0.581852
Nicn1	-0.0466637	0.91213
Loxl1	-0.213641	0.614124
Ift52	-0.19875	0.644566
Tctn1	0.553593	0.328773
Gng3	-0.222383	0.652809
Gtpbp2	0.285495	0.499359
Snx3	0.589994	0.164256
Ostc	0.0168931	0.967114
Shh	-0.231608	0.618836
Zfp691	-0.0311517	0.965144
Emp1	-3.41282	9.38885e-06
Ptp4a3	0.353124	0.516984
Srek1ip1	-0.114689	0.78802
Theg	0.234605	0.656817
Sar1a	0.289434	0.482638
Gal	0.384661	0.490635
2810408I11Rik	-0.557101	0.198205
Dnase1l1	0.536152	0.436238
Tor1b	0.183296	0.662057
Atxn7l3	0.11091	0.793112
Rpl21	1.01921	0.0912283
Fam175b	-0.133574	0.74962
Gpr108	-1.38552	0.00450654
Krt2	-0.326964	0.514703
Dlx1	-0.665871	0.158075
Sc4mol	-2.45022	6.98582e-05
Aqp1	0.942047	0.0596262
Prune2	1.82243	0.00372841
Cenpf	-0.717465	0.175463
Sbno1	-0.143828	0.72789
C1qtnf2	1.04979	0.0635486
Mag	-0.0319981	0.941198
Spef1	-0.431425	0.327999
Mki67ip	0.258621	0.55139
Hmgxb3	-0.159388	0.70065
Nmrk1	-0.181557	0.707252
Hist1h2ae	-1.21404	0.0321632
Hs3st1	2.82172	3.37723e-05
Psd3	-0.550732	0.210808
Gars	-0.177738	0.665017
Nudt1	-0.472839	0.265588
Mlx	0.0125541	0.976004
Itih2	-0.259067	0.677958
Dusp4	-1.59987	0.00260682
Hs3st3a1	0.284452	0.606137
Ifngr2	0.806334	0.0799621
Arl3	0.210175	0.61502
Adam9	-0.162173	0.69233
Zfp148	0.0181543	0.965095
Cdr2	-0.365936	0.378842
S100a13	0.784876	0.0752684
Tex11	2.86445	3.26715e-05
Slc6a17	-0.303715	0.500293
Fbxo45	0.0997924	0.813962
Trim26	0.490895	0.247036
Scel	-0.87587	0.0878638
Taco1	-0.595024	0.317093
Ube2cbp	-0.246082	0.580743
Slc22a7	0.11621	0.83563
Tead2	-0.888093	0.0451801
Oard1	0.39533	0.381398
Brca2	-0.819563	0.0744504
Armc6	-1.08749	0.0248304
Fkbp10	-0.513361	0.224392
Reep3	0.297547	0.477404
Creb3l2	-0.344843	0.461839
Smim12	0.0514509	0.901428
Kank2	0.318166	0.444886
Prpf38b	0.484776	0.382778
Tril	0.342762	0.515994
Mfn2	0.369737	0.374826
Ezh1	0.692234	0.148435
Helz2	-0.476937	0.256818
Cldn1	-0.630899	0.267511
Wdr64	0.123443	0.806875
Elovl4	-2.75144	3.81537e-05
Cd93	-0.860536	0.116512
Nudt16l1	0.464161	0.277646
Prps2	-0.143822	0.735247
Rab3gap2	0.291467	0.506372
Olfr109	-0.870292	0.136497
Snip1	0.124151	0.793926
Ddx1	-0.437817	0.297265
Hoxc5	-0.205951	0.711457
Ccz1	-0.466282	0.268521
Zfp869	-0.519651	0.238569
Wdr5	-0.786828	0.0744455
Sowahd	-0.938551	0.0428794
Tbc1d22a	0.20523	0.636419
B3gnt1	-0.184686	0.656951
Dnttip1	-0.0247301	0.952325
Erc2	-0.115416	0.813761
Cep63	0.132214	0.760347
Aurkaip1	0.425998	0.369051
Gucy1b3	-2.49795	6.31759e-05
Spaca3	-0.101878	0.848307
Grlf1	0.743354	0.150865
Olfr354	-0.13042	0.79008
Heatr3	-0.552765	0.213256
Filip1l	-0.0274203	0.947141
Mad2l2	-0.35026	0.400808
Pola2	-0.83392	0.0649334
Oxld1	0.23256	0.593158
Lrrn4cl	1.25398	0.34906
Pabpc4l	-0.00492271	0.991453
Kif16b	0.108512	0.808888
Efha1	0.585752	0.168213
Stx3	-0.47512	0.316761
Ush1c	-0.385004	0.607673
Bgn	0.675469	0.113597
Nt5e	-0.14668	0.799459
Xrcc3	0.141022	0.751107
Prpf31	0.0731943	0.870268
Aldh4a1	0.718226	0.102579
Traf3ip2	0.807154	0.0656906
Sec13	-0.217032	0.597348
Pold3	-0.119468	0.777293
Leprotl1	-0.799761	0.0673925
Wbp11	-0.184336	0.657883
Mcat	-0.0098995	0.981607
Stard7	-0.0811772	0.845177
Fam160b2	0.223106	0.598314
Lrdd	0.552598	0.221298
Atf6b	-0.0769756	0.853339
Entpd6	0.137323	0.763839
Nlrx1	0.767258	0.166871
AI118078	-0.212532	0.687871
Aldh1a2	1.39611	0.0220072
Isl2	-1.24376	0.0169792
Srd5a2	-0.0488626	0.929866
Slc9a8	0.007465	0.986121
Mbp	-0.442294	0.3744
Mogat2	1.08241	0.0303887
Arf2	-0.291729	0.486493
Cenpb	-0.161282	0.697698
2310061I04Rik	-0.403913	0.365024
Mgat3	1.32374	0.00927767
Cd9	0.288966	0.886672
Col4a3bp	-0.68534	0.118305
Aplp2	-0.055822	0.892054
Otx1	-0.465651	0.295404
Klrg1	0.260965	0.6186
Fhit	3.38515	1.42224e-05
2210407C18Rik	-0.219601	0.602409
Aurka	-1.41568	0.00387239
Cdk20	0.632141	0.167636
Tmem9	-0.400014	0.344594
Sephs1	-0.17585	0.730451
Ipp	-0.21024	0.631076
Mgst1	1.52504	0.00234039
Hoxb1	0.20832	0.682232
Stard10	1.01922	0.0253096
Golga5	-0.0733713	0.862126
Pus10	-0.335365	0.458876
1700019O17Rik	0.624374	0.198287
Foxj2	-0.178299	0.794779
Anks1	-0.132163	0.768744
Ddit3	0.451646	0.300301
Tdrkh	-0.846667	0.0915605
Arpp19	0.37877	0.369683
Mtch1	-0.369507	0.373292
Gfpt1	-0.397518	0.343845
Tsga14	-0.18023	0.697255
Urm1	-0.302146	0.495809
Pnpo	0.139095	0.738274
1010001N08Rik	1.09273	0.0198953
Heatr1	-0.470254	0.262457
Agxt	-0.0539448	0.924231
Parp3	1.57715	0.00206493
Mcl1	0.19316	0.638373
Cep97	0.532994	0.233711
Mettl6	0.0086278	0.983956
Trim33	-0.175876	0.672346
Ext2	-0.0336081	0.935835
Acaa2	1.92961	0.000369764
5730508B09Rik	-0.215207	0.667615
Vash1	-1.11806	0.0280198
Spesp1	0.00995194	0.984298
E030019B06Rik	-0.195446	0.681997
2810032G03Rik	0.842058	0.107253
3110043A19Rik	-0.316902	0.587423
Akap10	-0.0995629	0.820344
Ptp4a1	0.104483	0.80087
Agxt2l2	1.2681	0.00998111
Angptl6	-0.0436623	0.91738
Fam168a	0.340527	0.427509
Tfip11	-0.134359	0.755358
Zfp459	-0.00698433	0.98951
Smoc1	-0.796727	0.0854185
Rfc1	-0.709009	0.112326
Mrps12	0.0266894	0.948186
Prep	-0.22593	0.584332
Spatc1l	-0.112807	0.829431
Rpusd3	-0.247979	0.578551
Myo1c	0.201554	0.630794
Naa38	-0.149948	0.715937
Rlf	0.771626	0.0856052
Cenpt	-1.38814	0.00431422
Cxadr	0.791555	0.0718391
B630005N14Rik	0.472065	0.271741
Atp4a	0.577401	0.218156
NA	-0.000652736	0.998745
D930048N14Rik	0.309444	0.580422
Cmtm5	0.0373437	0.984672
1810062G17Rik	-0.26718	0.591115
Zfp235	0.42105	0.602714
Bcas3	0.41331	0.327827
Pcm1	0.0756038	0.860424
Zmynd8	-0.249166	0.549233
Dars2	0.0838536	0.887751
Enthd2	0.0968689	0.845218
Dynlrb2	0.0218363	0.970037
Bora	-0.655056	0.154085
Polr3a	-0.27196	0.52986
Fam72a	-0.218103	0.706702
Ppp6r3	-0.328126	0.43055
4930404A10Rik	-0.15169	0.800025
Klhl31	0.10241	0.851569
Wdr82	0.249684	0.551109
St8sia1	1.16522	0.0232885
Atf5	-0.961163	0.0314793
Smarca1	0.896775	0.0571496
NA	0.864082	0.127681
Scamp5	0.249289	0.555411
Sin3b	-0.373835	0.387672
4930568D16Rik	-0.0994102	0.868356
1600023N17Rik	-0.0192398	0.988122
Agfg2	0.024601	0.952374
Asna1	-1.07944	0.0179896
Thy1	4.20889	2.67103e-06
Zfp473	-0.32079	0.704547
Gimap6	-0.168849	0.68438
Ubr7	0.223713	0.595096
Pcid2	-0.892651	0.0481382
Tmem66	-0.549123	0.197875
1700052K11Rik	1.0187	0.0644243
Jtb	0.0288709	0.944256
Eno4	0.127601	0.858129
Rundc1	0.385235	0.484693
Fcgr4	1.7687	0.00255038
Galnt2	-0.755957	0.0823418
Hpx	-0.64283	0.751146
Commd3	0.818891	0.060754
Tgif1	-0.324056	0.440774
Mrvi1	0.920035	0.107127
Slc51b	-0.38085	0.474315
Ctag2	0.0771657	0.886138
Ift27	0.92831	0.0405441
Igsf1	-0.0685676	0.907019
Ccdc53	0.790246	0.0705154
Dock2	-0.0977464	0.860653
Ung	-0.283452	0.516685
Ctsf	0.782137	0.0792306
Tceb2	0.0563266	0.890431
Polg2	-0.222336	0.617924
Olfr552	0.0515749	0.914087
Gtpbp4	-0.150372	0.71483
Cdc42se1	0.134599	0.743376
Clhc1	-0.369298	0.383759
Clps	-0.368795	0.425244
Metap1	-0.255446	0.541153
Cog4	-0.487961	0.257941
Tmem17	0.148992	0.784885
Hpdl	-0.101637	0.816896
Mrpl13	-0.289631	0.48431
Kcnh7	-1.30923	0.0170497
Gldn	-0.163088	0.747567
BC028528	0.670862	0.231945
Rad52	0.435349	0.702053
Gtf2f2	-0.402364	0.343357
Dmpk	0.649966	0.144597
Anxa2	0.364319	0.378796
Dysf	1.21876	0.0131599
Smarce1	0.156694	0.704364
Nt5c	0.239723	0.568349
Bag2	-0.928398	0.0412576
NA	0.102541	0.851264
Gar1	0.0798814	0.846172
Rab11b	-0.306959	0.491902
Ccar1	0.136064	0.742784
Rhbdf2	-0.319517	0.485626
Aim1	-1.975	0.000751786
Rhoj	-0.219598	0.594629
Dhrs7b	-0.465849	0.280268
Hes6	0.225433	0.586105
Kremen1	0.0129005	0.976598
Plat	-0.623079	0.145672
Mrps30	-0.438471	0.295084
Lacc1	-0.18456	0.675996
4930550L24Rik	-0.642551	0.13638
Fiz1	-0.397455	0.34565
Tmem11	-0.0905966	0.825475
Hoxb4	-0.526541	0.34982
Smpd3	-0.416892	0.316869
Tnfrsf25	1.00686	0.0728298
Ap2a2	-0.574958	0.176
Spon2	-0.678954	0.121617
Rint1	-0.2118	0.621892
Tsta3	-0.0490807	0.905445
Hadha	-0.49237	0.294384
Dym	-0.206578	0.617583
Pcbd2	0.60834	0.155434
Tm9sf4	-0.37394	0.380664
Nde1	-0.122524	0.765427
Tsc2	-0.0544737	0.895233
Casq2	-1.69432	0.00357438
BC034090	0.6204	0.465467
Vps45	0.0432261	0.929528
Wnt2b	-0.818296	0.0900069
Ergic3	0.373591	0.374684
Gtf2e2	-0.898646	0.0435156
4930583I09Rik	-0.138979	0.816645
9430015G10Rik	0.0373088	0.931141
Nmral1	-0.425391	0.310763
Tmem161a	-0.600514	0.206819
Keap1	-0.643976	0.136662
Tmem101	0.205026	0.642524
1110057K04Rik	-0.165408	0.690153
Laptm4a	0.917427	0.0382539
Foxn1	0.140177	0.890782
2900026A02Rik	0.498834	0.26743
Tfcp2l1	0.983192	0.0379769
Dtnbp1	-0.0229836	0.955395
Ndnl2	-0.0927568	0.822541
Sf3b1	0.368674	0.389021
Wisp2	0.419786	0.438114
Ldb1	0.104796	0.798888
Fat1	-0.20984	0.61182
C2cd2l	-0.165921	0.695003
Tada1	0.77273	0.0848075
Anapc2	-0.246031	0.552384
Fancm	0.241425	0.667951
Adamtsl4	-0.634123	0.173787
Lrp11	-0.114091	0.791944
Fars2	0.339478	0.423414
Fxyd2	-0.238653	0.600482
Phf20l1	0.632289	0.193785
Slc12a9	-0.0831717	0.849546
Cdyl2	0.24411	0.584702
Eogt	-0.057042	0.923023
Gpr81	0.314571	0.586797
Myl4	-0.209086	0.712474
Camkk1	-0.711751	0.136174
Mtmr10	0.0975326	0.842152
Akap5	0.0889606	0.836656
Plau	0.279776	0.551662
Serpina6	-0.358379	0.418191
Polr2e	0.541973	0.197747
Chi3l1	0.388893	0.384224
Cxcr5	-0.386663	0.354348
NA	-0.23198	0.690876
Fbxw9	0.0980316	0.855282
1700025E21Rik	0.0896473	0.826704
Miat	0.721247	0.123681
Pomt1	-0.154399	0.792616
Gm16515	-0.399051	0.479067
Zfp867	0.601482	0.25497
Msi2	1.58525	0.00423254
9030612E09Rik	-0.149761	0.771483
Wdhd1	-0.471105	0.290785
Armc7	0.835628	0.100298
Phpt1	-0.432199	0.306746
Cfl2	0.503307	0.244796
Trim62	0.891614	0.073246
Ifi27l1	0.927559	0.0364084
Cdh17	-0.0932404	0.879943
Zfpm2	2.1724	0.000228974
Mrpl28	-0.395375	0.343468
1700030K09Rik	-0.711307	0.119713
Nadkd1	1.013	0.0657625
Nos3	0.613587	0.251185
Cul7	-0.118246	0.775175
Rsl1d1	0.10018	0.808532
Gnpat	-1.11914	0.0159267
Cdk11b	0.0641528	0.876739
Ppm1f	0.135884	0.743393
Tmc1	-0.227156	0.687664
Scg5	4.05274	3.25985e-06
Sim2	0.0313388	0.953684
Stt3b	-0.214975	0.601309
Coil	0.0677926	0.922675
Cd1d1	0.696335	0.112639
Yipf1	0.713752	0.107033
Arhgef10	-1.4356	0.00416263
Rassf5	0.772004	0.121907
Pkd2l1	-1.75262	0.00525709
Gadd45a	0.208344	0.619629
Tmem119	1.92234	0.00105445
Acad11	0.873354	0.0825895
Smpd4	-0.0551026	0.906464
Gprc5b	0.894382	0.0670727
B3gnt7	-0.0421403	0.941683
Acin1	-0.125669	0.761959
Slc19a2	1.35822	0.00546049
Rab32	0.424846	0.36637
Zfp518b	-0.510418	0.231793
Fgfr2	3.11233	1.27591e-05
Akt3	-0.90941	0.0483045
Rtn4	0.287341	0.548012
Anxa8	-2.22505	0.000231437
Epgn	-0.192696	0.770798
Slc35a2	0.848495	0.0636827
Mkrn2	-0.114464	0.783444
Ocrl	-0.175768	0.672879
Mrpl15	-0.201541	0.682846
Insig2	0.361283	0.396447
Snx24	-0.292338	0.484868
Ramp2	0.466326	0.426022
Neto2	0.0296697	0.95962
Txnl4b	-0.883681	0.0583243
Tmem176b	1.0951	0.0163751
Itm2c	0.584079	0.172044
Sec14l1	-0.723269	0.101922
Ddx17	0.340636	0.411011
NA	0.0136835	0.980946
Rab3ip	0.479864	0.268653
Ccdc91	0.297651	0.484968
Ahsa1	-0.0528165	0.89756
Gm16516	0.306902	0.534905
Trmt2b	0.339067	0.440026
Lrp2	-1.23289	0.0105867
Acot13	-0.259732	0.53314
C87436	0.146963	0.743007
Uba5	-0.162105	0.698611
Palm	-0.248683	0.585383
Sra1	0.424921	0.317659
Chmp7	-0.323913	0.4416
Abi3	-0.03467	0.956013
Fyco1	0.408718	0.352146
Hspb8	-0.0491921	0.904781
Txnrd1	0.153223	0.709238
4930550C14Rik	0.340317	0.553729
Pdcd2l	0.00394847	0.992402
Hsf2bp	-0.0662373	0.907859
Jdp2	0.315276	0.448007
Tmem59	0.419578	0.314751
Tceb3	0.705506	0.106886
Ndfip2	-0.192147	0.647675
Pdcd6ip	0.845657	0.0589307
Rnf145	-0.238395	0.570019
Nbr1	0.502898	0.236353
2310068J16Rik	-0.0734094	0.881898
2810417H13Rik	-0.588875	0.229077
Vash2	-0.800505	0.0696998
Tbxa2r	-0.470695	0.316878
Dhx34	0.150206	0.736273
Snapc5	0.0743429	0.866493
Serinc1	0.465095	0.265366
Slc36a3	0.0275544	0.965635
Fastkd3	-0.132444	0.760872
Golga1	-0.167313	0.690935
Eif1b	0.106357	0.796663
Foxk1	0.369682	0.385269
Tank	-0.177576	0.677465
Tmem35	0.592061	0.171756
Ppap2c	0.361019	0.385195
Lgmn	-0.314719	0.44853
Pbx2	-0.0603104	0.883044
2310035C23Rik	0.143211	0.730771
Amn	-0.0229793	0.963417
Gypa	-0.0497654	0.928358
Reg3a	-0.163154	0.759404
Bmi1	0.514714	0.233577
Bhlha9	-0.884969	0.0742017
Dennd6a	0.132001	0.752367
Ctrl	-0.332728	0.543692
Lonp1	0.322154	0.441888
NA	-0.271194	0.516842
Mast4	1.22215	0.00963467
P2rx4	-0.832049	0.076062
Ift88	0.933804	0.0755264
Rsf1	0.236135	0.589153
Abca3	-0.0058807	0.988857
Trim8	-0.134387	0.746348
Ttc33	0.229083	0.593983
Ahcyl1	0.320358	0.439979
Mb21d2	0.295321	0.501053
Mynn	0.215433	0.612721
Sirt3	-0.0423359	0.920842
Dok3	-0.286851	0.547978
Zbtb7c	1.34163	0.00797965
Dynlrb1	0.319806	0.439389
Sdf4	0.710437	0.105779
Psmb10	-0.0280965	0.945561
Bmf	0.448305	0.303823
Ptgfrn	0.61683	0.157806
Ankrd9	0.143754	0.789232
Serpinb1a	2.39291	0.000213275
Wnk4	0.122632	0.812652
Irx5	-1.53337	0.139694
Pla2g2e	-0.338062	0.592789
Prpf39	0.550491	0.214649
Dcx	0.157161	0.783687
Atg3	0.252088	0.551888
Zfyve16	-0.290933	0.50872
Ctnnb1	0.436716	0.297198
Ciao1	0.560806	0.392606
BC029722	-0.0835958	0.840085
NA	-0.814567	0.0667603
Manea	0.287054	0.507309
Maz	-0.212724	0.667646
Rnf25	0.414377	0.336979
Csrnp2	0.235838	0.574093
Ccdc14	0.174147	0.716827
Use1	0.397252	0.340827
Kcnj4	-0.0429493	0.92161
Uspl1	-0.418182	0.325256
Iffo2	-0.614147	0.158178
Atg2b	0.49028	0.366666
Tnfrsf12a	-0.224753	0.58486
Caprin1	0.663032	0.188898
Dhx38	-1.07643	0.0190086
Pgrmc1	0.505222	0.271582
Srrd	-0.0381655	0.931716
Slc15a4	-0.167528	0.704781
Prtg	0.372743	0.407835
Ascl1	-0.32483	0.537143
Mapk9	0.0351216	0.932276
Decr1	0.121167	0.773525
NA	0.998507	0.0314307
C1qbp	-0.129473	0.753329
Bad	0.320182	0.443558
Hebp2	0.532619	0.289401
Pld1	-0.64919	0.168915
Ddit4l	2.33022	0.000104281
Dctn5	0.0455454	0.912857
Slpi	0.503086	0.291961
Fam101b	-0.438132	0.333664
Chst7	-0.575762	0.240229
Rcl1	-0.592453	0.165598
Il31ra	0.420686	0.693873
Lamc3	0.618738	0.204221
Gcnt3	-0.168026	0.71961
Dhcr7	-1.01379	0.027836
Sirpa	-0.448816	0.290104
Cep128	-0.158754	0.725014
Msx1	0.396155	0.379187
Plcb3	0.0585107	0.888535
Nkd2	0.740571	0.749112
Sytl4	-0.657268	0.169439
Parp2	-0.0462536	0.911692
Rasal3	-0.106409	0.851074
Pklr	-0.416404	0.325051
Spcs3	-0.872879	0.0469852
Ogfr	0.0533511	0.897221
Cep350	0.0170279	0.967448
Iqsec3	-0.579345	0.216265
Spsb1	1.15147	0.0126234
Rad18	-0.175445	0.73036
Qtrtd1	-0.0790332	0.970847
Per2	0.0331739	0.944187
Bbx	0.188507	0.654833
Ctsh	3.30428	9.75289e-06
BC022687	0.706652	0.183398
Tmem41b	0.282935	0.537771
Oas1c	2.07233	0.00111266
Rps6kl1	-1.09795	0.0298294
Uts2r	-0.358068	0.467037
Cyb5r3	-0.0656033	0.872896
Tppp	0.376774	0.484845
Tmem208	-0.463734	0.271864
Whsc1	0.113472	0.785758
A930013F10Rik	-0.594009	0.525596
Vopp1	0.383335	0.390898
Melk	-0.56917	0.240624
Arrb2	-0.246245	0.565837
Esyt1	0.366557	0.380841
5730409E04Rik	1.04628	0.0336068
Nt5dc2	-1.03826	0.0216343
Slc4a11	0.449676	0.399552
Gdpd2	0.704873	0.136106
Samd14	-0.213303	0.864267
Fam117a	1.11461	0.0389329
Lmbrd1	1.09082	0.0220133
Glis3	-0.0652536	0.907779
Tjp2	-0.533198	0.207666
Mettl18	0.0746784	0.865907
Gyltl1b	0.0395143	0.930501
Ubl3	0.358932	0.389309
Scnn1b	-0.646368	0.136802
Zbtb24	0.975883	0.0342185
Rras	-0.211993	0.610049
Hint2	0.69085	0.1153
Ldoc1l	-0.214839	0.61814
Mfsd9	0.387217	0.409059
Sharpin	0.530542	0.208929
Ghdc	-0.682094	0.665443
Sh2d2a	-0.145997	0.810555
Kin	0.0340162	0.948489
Akap12	-1.29764	0.00640184
Krt7	-0.431819	0.30024
Acot7	-0.562344	0.185553
Gphb5	-0.179318	0.795896
Nedd1	0.114398	0.784325
Pdzd11	-0.100097	0.811964
Notch3	0.443128	0.441546
Slu7	0.563755	0.326828
Asb18	-0.519151	0.310438
Oas1b	0.355461	0.473717
Pmvk	-1.24413	0.0130308
Clasrp	0.570998	0.192558
Rad1	-0.545561	0.229927
Yipf7	-1.58625	0.00880703
NA	1.4576	0.00342266
Stxbp5	0.782154	0.12859
Hist1h2bc	-2.01403	0.000428385
Garnl3	0.653119	0.282168
Ptrh1	0.906145	0.0451048
Mpp1	-0.332807	0.483024
Lrwd1	-0.156024	0.712975
Irs1	-1.01678	0.030339
St3gal2	-0.711925	0.099467
Fance	-0.00110937	0.997954
Tspan6	0.587475	0.184711
Rhog	-0.0718095	0.86663
Map3k1	-0.284965	0.491124
Fto	-0.49271	0.240253
Fbxl8	-0.985223	0.0332717
Bcap31	0.386207	0.355673
Fcho2	-0.156356	0.709395
Spryd3	-0.25575	0.548628
Lcn6	-0.298698	0.512224
Slc4a9	-0.0192399	0.974653
Zc3h8	-0.449328	0.308575
Scarf2	3.01596	1.92518e-05
9530077C05Rik	-0.316019	0.473256
Ccdc114	1.15852	0.0351555
Col5a2	0.487651	0.246678
Nrd1	0.450764	0.281984
Hbegf	0.606439	0.26612
Cinp	-0.327631	0.511653
Reep6	0.40146	0.336221
Pwp1	0.0350892	0.93237
Hat1	-0.298018	0.472347
Lpp	0.257414	0.532879
Rabl3	0.233022	0.583641
Fam78b	-0.00974089	0.98418
Klf9	-0.693578	0.106747
Tsnaxip1	-0.255905	0.660217
Prss41	0.0705568	0.905305
2610206C17Rik	-0.00413298	0.997717
Sephs2	-0.246563	0.566626
Hnrnpul2	0.114309	0.783743
4930444A02Rik	0.0313388	0.953315
Il6ra	-0.243671	0.716739
Agpat4	-1.15531	0.0167669
Lrba	0.393863	0.355856
Rgp1	0.604219	0.165335
Lrrc20	0.244448	0.65011
Wdr33	0.352402	0.452541
Plrg1	-0.0148773	0.971099
Camsap2	-0.320199	0.445905
Fsd1l	0.463695	0.357795
Fbxo7	0.430883	0.316439
Lifr	-0.503739	0.339705
Usp43	-0.306809	0.600764
Wbp1l	0.237998	0.563693
Pigf	-0.395877	0.343934
3110082I17Rik	-0.20763	0.618379
Ecd	-0.551677	0.198206
Sdc4	0.176875	0.666585
Gnao1	-0.145454	0.759391
Ppp1r3b	-0.758668	0.0879255
Nfkbib	0.576988	0.33252
Rdh14	1.12923	0.0281158
Iffo1	0.164297	0.709283
Zfp524	0.00856626	0.984298
Pter	0.69531	0.186115
Gba	0.409666	0.330046
Farsb	-0.328844	0.428912
Rbbp5	-0.28516	0.518715
Gnat1	-0.23349	0.608032
Slc43a3	0.58247	0.169417
Rab38	1.87583	0.00120681
Zbtb39	0.221555	0.627437
Kdm3a	0.772392	0.0794471
Urod	0.486779	0.248446
Mllt6	0.074721	0.856452
Ptpn9	-0.526463	0.222193
Nrgn	-0.295046	0.513901
Plgrkt	-0.224448	0.588641
Prok2	-0.0896293	0.883233
Ptplad1	0.428934	0.303119
Gdap2	0.482478	0.389083
Eef2k	0.0437699	0.941056
Setd4	0.560798	0.26206
4933411K20Rik	-0.508478	0.232417
Acy1	0.39961	0.342745
Med24	0.0567407	0.891365
Dnajb1	-0.540416	0.201774
Nars	-0.385964	0.353636
Dbt	-0.0588636	0.891725
Foxs1	-1.16087	0.029046
Slc25a28	-0.403316	0.33622
Olfr137	-0.277552	0.641867
Vps54	-0.245931	0.559305
Olfr167	-0.610847	0.221459
Dhcr24	-0.749129	0.085952
Tbr1	-0.855332	0.072703
Liph	0.166772	0.776933
Pcyox1	0.509953	0.22676
Csrnp1	0.51021	0.230325
Eif4h	-0.0481808	0.906238
Dcps	-0.645975	0.141429
Lrrc38	-0.291301	0.497362
Hmha1	0.971014	0.0318962
B3gntl1	0.296262	0.555466
Ubqln4	-0.126038	0.76167
Ccdc125	-0.500312	0.337472
Grpel1	0.0523792	0.913669
Rnf123	0.510656	0.256226
4930548F15Rik	-0.0865249	0.878626
2310011J03Rik	0.8208	0.0733993
Dpp8	-0.0825043	0.846496
Ggt7	-0.62526	0.158408
Gorasp2	-0.747887	0.0881106
Sertad4	1.20476	0.0105144
Gsx1	-0.220976	0.637234
Cd59a	0.578922	0.197501
Hbp1	0.468402	0.26569
Krcc1	0.510154	0.246887
Rasd2	3.00787	5.52794e-05
Bloc1s5	0.328486	0.435559
T	-0.175282	0.72531
Bccip	-0.305113	0.466967
Mettl16	-0.402331	0.349488
Prkcq	-0.180833	0.745046
Inpp5e	0.0189771	0.970528
2310047M10Rik	-0.24795	0.593136
Vrk1	0.414867	0.35073
Rom1	-0.270208	0.535509
Rock1	-0.227171	0.584288
Phf8	0.470243	0.274288
Tmed10	-0.0733375	0.858369
Npy2r	0.0965644	0.864809
Nr2c2ap	-0.945188	0.0476379
Chrd	-1.74736	0.00143407
Slc7a4	-0.211065	0.683763
Slc7a3	2.82725	8.68516e-05
Epha8	0.0591403	0.906057
Tsc22d2	0.551778	0.19915
Col4a2	0.661866	0.120639
Lmnb1	-0.787534	0.077842
Tsku	0.698329	0.216512
Cdk6	-0.449508	0.393248
Vill	0.790316	0.187277
Trex2	-0.111134	0.827666
Grap	0.181808	0.760151
Eppin	0.203153	0.729975
Farp2	-0.15999	0.706752
Abcg4	0.196923	0.6552
Tro	-1.09263	0.0201951
Ino80c	-0.237289	0.5768
Tti1	-0.326969	0.446467
Coq6	-0.00841908	0.983836
Wasl	0.175326	0.671314
Phox2a	0.00747748	0.990077
Bak1	-0.542097	0.200462
Bbs2	0.558816	0.453668
St6gal1	-0.750037	0.0835029
Ankrd50	0.279096	0.508983
Smim15	-0.306106	0.47001
Usp44	-0.779029	0.173532
Lamtor2	0.612523	0.150819
Slc7a6	-1.07781	0.0239887
Cntln	0.563792	0.228603
Zdhhc13	-0.276669	0.512479
Nphp1	0.927525	0.793871
Tob1	0.592301	0.206963
Cmss1	-0.0341403	0.967642
Csnk1g1	0.16582	0.70069
Nr6a1	0.565272	0.236768
Ep400	-0.271565	0.523218
Naa16	0.0483565	0.911177
Gstm4	0.427373	0.348735
Tmem160	0.182244	0.657506
Nek3	-0.711406	0.105464
Stom	0.642403	0.138609
Rapgef3	1.01929	0.0311799
Zbtb41	0.134724	0.748618
1700049L16Rik	-0.744851	0.104591
Snai2	0.37123	0.415279
Emc9	0.587411	0.187558
Uqcr10	0.140322	0.731927
Trip13	-0.954762	0.0411441
Myo1b	-0.0903722	0.835977
Oasl2	1.14744	0.0216114
Lnx2	0.0218424	0.959707
Hps3	-0.145861	0.736464
Fam3a	-0.648599	0.138951
Creld1	0.0206889	0.960756
2410131K14Rik	-0.43789	0.321418
Creb3	0.627821	0.143519
Sap30	-0.830209	0.0580238
Kirrel	-0.170543	0.678675
Umodl1	0.471711	0.36333
Pou2af1	-0.163019	0.749731
Sec24c	-0.085257	0.837309
Dvl1	0.360577	0.396587
Pacrg	1.03785	0.0589106
Prc1	-0.884827	0.044731
1810013D10Rik	0.387277	0.38632
Kif5c	-1.8561	0.001491
Cirh1a	-1.09941	0.0171832
Siglece	-0.299028	0.550852
Pdcd10	0.16732	0.718479
Kif1b	-0.221486	0.605338
Ipo11	-0.784864	0.0740814
Igf2bp2	-0.816628	0.0636066
Nup205	-0.578298	0.175988
Ulk3	0.0252846	0.954891
Igf1r	-0.3344	0.436176
Ccndbp1	0.25683	0.56776
Zfp639	0.225542	0.596476
Clec4f	-0.0217537	0.965714
Zg16	-0.0640941	0.917452
Plin3	-0.140948	0.738443
Gmppb	0.196014	0.642616
Cul1	-0.172496	0.676787
Smap2	0.482976	0.263365
Nfatc3	-0.657935	0.162192
Pdlim4	-0.00686034	0.986755
Gid8	-0.297375	0.495859
Pcdh20	-2.09404	0.000661459
Irx3	-0.48529	0.289644
Wdr3	-0.107974	0.81348
Tulp3	-0.342807	0.418341
Man1b1	-0.518823	0.280312
Adamts19	0.535857	0.312793
Ppip5k1	0.345153	0.418432
Mrps10	-0.0702026	0.866054
Fbxo18	0.0944152	0.819992
Hmbs	-0.497359	0.25795
Smg5	-0.558182	0.19508
Vav3	-0.0853713	0.846463
B430319G15Rik	0.0975524	0.845483
Wnt3	0.147749	0.792644
Fhl2	-0.748056	0.0909678
Atf3	-1.05773	0.0605081
Alox12	0.175263	0.934978
Phactr1	-0.196636	0.754136
Dcaf5	-0.530121	0.234912
Ybx1	-0.517614	0.277095
Ugt2b1	-0.431795	0.842841
Lbr	-0.865775	0.0492232
Sqrdl	-2.43165	0.0004351
Cry2	0.0519477	0.938352
Zfp740	0.44022	0.298389
Amigo1	0.26603	0.6001
Il15	-0.151509	0.778778
NA	0.118034	0.786647
Fbxl17	0.585028	0.260569
Hyou1	-0.822171	0.072136
Szt2	0.0779353	0.860348
Slc4a1ap	-0.351055	0.406872
Pcca	-0.128552	0.790585
Zfyve27	-0.0299354	0.989689
Hsd17b3	-0.0687915	0.89543
Slc2a1	1.09189	0.0196685
Pex16	0.173931	0.694548
Bhlhe40	-1.55233	0.00202985
Folr1	1.19846	0.0106536
Prdm4	0.123353	0.77101
Ctsk	0.15661	0.798086
Man2b1	-0.0502671	0.903259
Sub1	0.938456	0.0454453
Optn	-1.35073	0.0252768
Dpagt1	-0.162033	0.69611
Fam229b	1.53024	0.00294179
Dag1	0.364186	0.380957
Arpc1a	-0.0477666	0.909611
Rgs7	-0.0906474	0.836404
Stac2	-1.77719	0.0577352
Arhgap27	-0.00301818	0.994906
Gas6	-0.00505249	0.99029
Rfxap	0.457756	0.385353
Draxin	0.0218363	0.969297
Ints3	-0.487696	0.294035
4921536K21Rik	-0.17585	0.730451
Gpcpd1	0.756581	0.0873307
Srsf11	0.0262029	0.950649
Carm1	-0.942752	0.0361824
Cmip	-1.06083	0.0224159
Olfr522	-0.0157471	0.97757
Llph	0.246226	0.561382
Zfp526	0.384116	0.52576
Bpnt1	-0.3193	0.464954
Srrm1	0.459835	0.276442
Lancl1	0.53432	0.238334
Avpr1a	1.67521	0.306014
B230216G23Rik	-0.0952272	0.857504
Zfp189	0.531563	0.361736
Hmg20a	0.157381	0.710147
Scamp3	0.0750172	0.856302
Tmem115	0.0412994	0.923368
B4galt7	-0.982359	0.0497134
Ecscr	0.614147	0.354934
St5	0.388465	0.354799
Tmem183a	-0.319762	0.44871
Cldn12	0.0749716	0.857533
Ndufa8	0.0125693	0.975675
Fbxo25	-0.79679	0.0727883
Evi5	-0.126682	0.759515
Gls2	-0.0290144	0.947744
9530091C08Rik	1.51634	0.00557191
Atox1	0.247198	0.549706
Abhd3	0.845048	0.852023
1810055G02Rik	-0.502961	0.232344
Fkbp9	-0.317597	0.44294
Chmp1b	0.0360322	0.935739
Frmd8	-0.913287	0.0741616
Stard3	-0.353015	0.442851
Pcdh7	-0.568457	0.252602
Cyb561d1	-0.00420154	0.992819
Tbc1d13	-0.292975	0.49152
Srp68	-0.142347	0.729318
4930455F23Rik	0.300629	0.500442
Slc27a4	0.0194988	0.967064
Csda	-0.428689	0.306448
Psmc5	-0.239969	0.561152
Myoz1	-0.201981	0.70717
AI467606	0.334861	0.44179
Tbpl1	0.762784	0.206541
Exo5	0.155761	0.712517
Tmem132a	-0.684663	0.11188
Ak5	0.576157	0.202061
Ppp2r4	-0.217942	0.598976
Lsm14b	-0.266212	0.533487
Jagn1	-0.0609588	0.882986
Csrp1	-0.287104	0.486683
Inhbe	0.395798	0.516642
Slc6a3	-0.325207	0.468249
Phxr4	0.751421	0.10217
Myo1d	-0.654	0.127037
Irf2bp1	0.481125	0.276811
Papolg	-0.0451111	0.917105
Sec61a2	-0.335296	0.424219
Ing2	-0.464194	0.331257
Sh3bp2	0.256023	0.579797
Gpd1	-0.503026	0.405335
Zfp358	-0.339574	0.423754
Blcap	0.45623	0.290201
Wnt7a	0.0648245	0.915025
Irgm1	-0.588265	0.190195
D030028A08Rik	0.840261	0.125492
Pet112	-0.0834495	0.87065
Nol11	-0.642965	0.135863
Snrnp25	-0.326308	0.433646
Tmem80	0.771682	0.0913798
Tmem201	0.434599	0.318075
BC021891	-0.609957	0.924248
Snap25	0.0764191	0.893843
Parp8	-0.185893	0.707496
Tmem169	0.0901864	0.874456
Shpk	0.729833	0.198207
Hif1an	-0.583141	0.17602
Ggcx	0.375195	0.454987
Idh3a	-0.0326845	0.936928
Whsc1l1	-0.247177	0.550906
Bcar3	0.542523	0.201446
Slc39a4	-0.245322	0.55549
Cep192	-0.443439	0.302735
Rab17	-0.206889	0.922131
Klhl25	-0.317254	0.473074
Dsp	-0.797521	0.127836
Kif3b	-0.0327822	0.93799
Mars2	-0.364566	0.474416
Hmox1	0.0784105	0.849126
Chic1	0.246212	0.575377
Sdpr	2.45696	6.19116e-05
Il17ra	0.139088	0.763527
Slc10a3	0.228971	0.593549
Ctr9	0.308983	0.528525
Zcchc4	-0.799021	0.189832
Copg	-0.270599	0.514084
Elovl5	-0.233436	0.570362
Afap1	-0.42772	0.310199
Itsn2	-0.370792	0.438384
P4hb	-0.106253	0.795175
Brap	0.0585878	0.888895
Klhdc10	-0.0959746	0.815061
9430024F10Rik|LOC101056497	-0.0778678	0.883906
Slc25a47	-0.0779024	0.86919
Adamts2	2.01579	0.000414438
1700030J22Rik	0.190552	0.7424
Wnt9a	-0.793252	0.0696211
Phf21b	-0.347663	0.479602
Sppl3	0.369463	0.375191
Cyb561	-0.79865	0.0801837
Plch2	-0.287432	0.510671
Pddc1	0.739386	0.105787
Creb3l4	1.0664	0.0348376
Peo1	-0.00718688	0.986693
Mapk4	-0.786371	0.146488
Trove2	-0.271709	0.510663
Gria3	1.23241	0.0132041
Plekho2	-0.608308	0.21529
Smc1a	0.0245433	0.956495
Surf4	0.0256962	0.949945
Asb16	-0.233392	0.688824
Pik3r3	1.18452	0.011934
NA	0.0901696	0.8436
Slc35b3	0.239557	0.566923
9130023H24Rik	0.91056	0.066861
Enkd1	-0.843445	0.0648827
Eif3k	0.335666	0.417678
Ppapdc2	-0.444222	0.33379
Tnfrsf4	0.679423	0.19051
Smyd4	0.0311274	0.944399
Mecr	0.0269116	0.948661
Dguok	-0.41449	0.328687
Fdxr	1.14693	0.026835
H2-Ea-ps	-0.183871	0.768435
1810065E05Rik	-3.90506	5.07299e-06
Mcee	0.5505	0.19609
Riiad1	0.882524	0.0834813
Zmym3	0.348413	0.417336
Zfp512	-0.157334	0.712838
Pcsk4	0.834082	0.0837303
Ttc8	0.480802	0.361317
Vmn1r84	-0.149761	0.770528
Slc43a1	-0.125223	0.79517
Cacna1h	-0.506579	0.785975
Sord	0.0947399	0.822798
2310007L24Rik	0.00990651	0.987123
Sh3d21	0.528585	0.228598
Gjb3	-1.95651	0.518627
[truncated: 12,219 more rows]

## Sheet: string_interactions MOSE-IIvI
#node1	node2	node1_string_internal_id	node2_string_internal_id	node1_external_id	node2_external_id	neighborhood_on_chromosome	gene_fusion	phylogenetic_cooccurrence	homology	coexpression	experimentally_determined_interaction	database_annotated	automated_textmining	combined_score
Isg15	Usp18	2107452	2098409	10090.ENSMUSP00000082548	10090.ENSMUSP00000032198	0	0	0	0	0.515	0.91	0.9	0.803	0.999
Fgfr2	Fgf10	2112234	2095442	10090.ENSMUSP00000112430	10090.ENSMUSP00000022246	0	0	0	0	0	0.92	0.821	0.815	0.997
Ccnd1	Cdkn1a	2108527	2095964	10090.ENSMUSP00000091495	10090.ENSMUSP00000023829	0	0	0	0	0	0.654	0.95	0.726	0.994
Stat3	Ghr	2112805	2105199	10090.ENSMUSP00000120152	10090.ENSMUSP00000069457	0	0	0	0	0	0.471	0.927	0.435	0.976
Ghr	Socs2	2105199	2094793	10090.ENSMUSP00000069457	10090.ENSMUSP00000020215	0	0	0	0	0	0.115	0.926	0.637	0.974
Arhgef3	Rhobtb1	2101464	2094765	10090.ENSMUSP00000046486	10090.ENSMUSP00000020101	0	0	0	0	0	0.339	0.916	0.424	0.965
Stat3	Pdgfb	2112805	2093117	10090.ENSMUSP00000120152	10090.ENSMUSP00000000500	0	0	0	0	0	0	0.95	0.281	0.963
Col3a1	Adamts2	2107752	2100319	10090.ENSMUSP00000085192	10090.ENSMUSP00000040171	0	0	0	0	0.52	0	0.9	0.202	0.958
Ephx1	Cyp1b1	2101673	2096123	10090.ENSMUSP00000047551	10090.ENSMUSP00000024894	0	0	0	0	0	0.073	0.9	0.513	0.95
Stat3	Egfr	2112805	2094834	10090.ENSMUSP00000120152	10090.ENSMUSP00000020329	0	0	0	0	0	0.114	0.528	0.885	0.948
Myl7	Acta2	2110449	2101808	10090.ENSMUSP00000099985	10090.ENSMUSP00000048218	0	0	0	0	0.055	0.272	0.9	0.245	0.941
Gnai1	Gnaz	2106032	2099556	10090.ENSMUSP00000074259	10090.ENSMUSP00000036087	0	0	0	0.976	0	0	0.941	0.299	0.941
Ephx1	Gstm2	2101673	2094130	10090.ENSMUSP00000047551	10090.ENSMUSP00000012348	0	0	0	0	0.145	0	0.9	0.345	0.939
Figf	Pdgfb	2098869	2093117	10090.ENSMUSP00000033751	10090.ENSMUSP00000000500	0	0	0	0	0	0	0.9	0.421	0.939
Cd55	C2	2096965	2096224	10090.ENSMUSP00000027650	10090.ENSMUSP00000025230	0	0	0	0	0	0.114	0.9	0.31	0.933
Igf2	Pdgfb	2112474	2093117	10090.ENSMUSP00000114076	10090.ENSMUSP00000000500	0	0	0	0	0	0	0.9	0.332	0.93
Arhgap22	Rhobtb1	2111594	2094765	10090.ENSMUSP00000107587	10090.ENSMUSP00000020101	0	0	0	0	0.132	0.099	0.913	0.083	0.929
Trf	Egfr	2099371	2094834	10090.ENSMUSP00000035158	10090.ENSMUSP00000020329	0	0	0	0	0.079	0	0.9	0.298	0.929
Igf2	Figf	2112474	2098869	10090.ENSMUSP00000114076	10090.ENSMUSP00000033751	0	0	0	0	0	0	0.9	0.262	0.923
Cyp1b1	Gstm2	2096123	2094130	10090.ENSMUSP00000024894	10090.ENSMUSP00000012348	0	0	0	0	0	0	0.9	0.262	0.923
Cysltr1	Htr2b	2104398	2096896	10090.ENSMUSP00000063520	10090.ENSMUSP00000027431	0	0	0	0	0.113	0	0.914	0	0.92
Usp18	Irf7	2098409	2096662	10090.ENSMUSP00000032198	10090.ENSMUSP00000026571	0	0	0	0	0.837	0	0	0.48	0.912
Stat3	Ccnd1	2112805	2108527	10090.ENSMUSP00000120152	10090.ENSMUSP00000091495	0	0	0	0	0.051	0.472	0.528	0.664	0.91
Colec11	C2	2102009	2096224	10090.ENSMUSP00000049285	10090.ENSMUSP00000025230	0	0	0	0	0.091	0.062	0.9	0	0.907
Usp18	Gmps	2098409	2097498	10090.ENSMUSP00000032198	10090.ENSMUSP00000029405	0	0	0	0	0.118	0.894	0	0.09	0.907
Col3a1	Pcolce2	2107752	2094277	10090.ENSMUSP00000085192	10090.ENSMUSP00000015498	0	0	0	0	0.067	0.068	0.9	0.048	0.906
Flrt1	Fgf10	2111795	2095442	10090.ENSMUSP00000109010	10090.ENSMUSP00000022246	0	0	0	0	0	0.048	0.9	0.055	0.902
F2r	Htr2b	2104103	2096896	10090.ENSMUSP00000061754	10090.ENSMUSP00000027431	0	0	0	0.621	0	0	0.9	0.079	0.901
Cysltr1	F2r	2104398	2104103	10090.ENSMUSP00000063520	10090.ENSMUSP00000061754	0	0	0	0.724	0	0	0.9	0.048	0.9
Myl7	Mylk	2110449	2095867	10090.ENSMUSP00000099985	10090.ENSMUSP00000023538	0	0	0	0	0.054	0.299	0.838	0.123	0.893
Egfr	Pdgfb	2094834	2093117	10090.ENSMUSP00000020329	10090.ENSMUSP00000000500	0	0	0	0	0	0	0.8	0.468	0.889
Fgfr2	Pdgfb	2112234	2093117	10090.ENSMUSP00000112430	10090.ENSMUSP00000000500	0	0	0	0	0	0.045	0.846	0.255	0.881
Gbp2	Irgm2	2114300	2103164	10090.ENSMUSP00000132435	10090.ENSMUSP00000056001	0	0	0	0	0.797	0	0	0.424	0.878
Fgf10	Egfr	2095442	2094834	10090.ENSMUSP00000022246	10090.ENSMUSP00000020329	0	0	0	0	0	0	0.8	0.408	0.876
Figf	Egfr	2098869	2094834	10090.ENSMUSP00000033751	10090.ENSMUSP00000020329	0	0	0	0	0	0	0.8	0.399	0.874
Fgfr2	Figf	2112234	2098869	10090.ENSMUSP00000112430	10090.ENSMUSP00000033751	0	0	0	0	0	0.045	0.846	0.191	0.871
Isg15	Irf7	2107452	2096662	10090.ENSMUSP00000082548	10090.ENSMUSP00000026571	0	0	0	0	0.502	0	0	0.713	0.851
Ccnd1	Pgr	2108527	2104405	10090.ENSMUSP00000091495	10090.ENSMUSP00000063562	0	0	0	0	0.042	0.478	0.201	0.611	0.824
Hist1h4i	Hist1h2bc	2110478	2094489	10090.ENSMUSP00000100042	10090.ENSMUSP00000018246	0	0	0	0	0.399	0.412	0	0.543	0.824
Irgm2	Usp18	2103164	2098409	10090.ENSMUSP00000056001	10090.ENSMUSP00000032198	0	0	0	0	0.764	0	0	0.252	0.815
Stat3	Cdkn1a	2112805	2095964	10090.ENSMUSP00000120152	10090.ENSMUSP00000023829	0	0	0	0	0.084	0.114	0.246	0.727	0.81
Thy1	Cd34	2112005	2094376	10090.ENSMUSP00000110489	10090.ENSMUSP00000016638	0	0	0	0	0	0	0	0.793	0.793
Pgr	Egfr	2104405	2094834	10090.ENSMUSP00000063562	10090.ENSMUSP00000020329	0	0	0	0	0	0.132	0	0.761	0.784
Glipr1	Cd40	2106046	2094452	10090.ENSMUSP00000074359	10090.ENSMUSP00000017799	0	0	0	0	0	0.771	0	0	0.771
Dpysl5	Gmps	2107779	2097498	10090.ENSMUSP00000085400	10090.ENSMUSP00000029405	0	0	0	0	0.492	0	0	0.546	0.759
Acta2	Rhbdl3	2101808	2094456	10090.ENSMUSP00000048218	10090.ENSMUSP00000017836	0	0	0	0	0.055	0.314	0	0.63	0.739
Irgm2	Irf7	2103164	2096662	10090.ENSMUSP00000056001	10090.ENSMUSP00000026571	0	0	0	0	0.642	0	0	0.288	0.734
Acta2	Coro2b	2101808	2100626	10090.ENSMUSP00000048218	10090.ENSMUSP00000041826	0	0	0	0	0.094	0.43	0	0.524	0.732
Ccnd1	Egfr	2108527	2094834	10090.ENSMUSP00000091495	10090.ENSMUSP00000020329	0	0	0	0	0	0.047	0	0.724	0.725
Stat3	Cd40	2112805	2094452	10090.ENSMUSP00000120152	10090.ENSMUSP00000017799	0	0	0	0	0	0	0.3	0.607	0.713
Stat3	Pgr	2112805	2104405	10090.ENSMUSP00000120152	10090.ENSMUSP00000063562	0	0	0	0	0	0.471	0.157	0.401	0.71
Dclk1	Rhbdl3	2102140	2094456	10090.ENSMUSP00000050034	10090.ENSMUSP00000017836	0	0	0	0	0.055	0.349	0	0.543	0.694
Stat3	Fgfr2	2112805	2112234	10090.ENSMUSP00000120152	10090.ENSMUSP00000112430	0	0	0	0	0.046	0.115	0.196	0.599	0.691
Ptk2b	Egfr	2095565	2094834	10090.ENSMUSP00000022622	10090.ENSMUSP00000020329	0	0	0	0.652	0.051	0.115	0.528	0.732	0.677
Tubb3	Acta2	2105452	2101808	10090.ENSMUSP00000071134	10090.ENSMUSP00000048218	0	0	0	0	0.113	0.168	0	0.595	0.675
Ivl	Krt14	2103816	2093902	10090.ENSMUSP00000059780	10090.ENSMUSP00000007272	0	0	0	0	0.054	0	0	0.669	0.673
Cp	Trf	2111084	2099371	10090.ENSMUSP00000103965	10090.ENSMUSP00000035158	0	0	0	0	0.146	0.105	0	0.605	0.672
Gbp2	Irf7	2114300	2096662	10090.ENSMUSP00000132435	10090.ENSMUSP00000026571	0	0	0	0	0.459	0	0	0.42	0.672
Ifi27l2a	Irf7	2102934	2096662	10090.ENSMUSP00000054698	10090.ENSMUSP00000026571	0	0	0	0	0.598	0	0	0.202	0.665
Cd40	Serpinb9b	2094452	2093801	10090.ENSMUSP00000017799	10090.ENSMUSP00000006392	0	0	0	0	0	0	0	0.665	0.665
Serpinb1a	Cd40	2106305	2094452	10090.ENSMUSP00000075690	10090.ENSMUSP00000017799	0	0	0	0	0	0	0	0.664	0.664
Thy1	Cd40	2112005	2094452	10090.ENSMUSP00000110489	10090.ENSMUSP00000017799	0	0	0	0	0	0	0	0.664	0.664
Cd40	Cd34	2094452	2094376	10090.ENSMUSP00000017799	10090.ENSMUSP00000016638	0	0	0	0	0	0	0	0.661	0.661
Stat3	Il4ra	2112805	2098646	10090.ENSMUSP00000120152	10090.ENSMUSP00000033004	0	0	0	0	0.121	0.047	0.3	0.488	0.66
Gbp2	Usp18	2114300	2098409	10090.ENSMUSP00000132435	10090.ENSMUSP00000032198	0	0	0	0	0.561	0	0	0.246	0.655
Thy1	Cd24a	2112005	2103486	10090.ENSMUSP00000110489	10090.ENSMUSP00000057983	0	0	0	0	0	0	0	0.652	0.652
Stat3	Cd24a	2112805	2103486	10090.ENSMUSP00000120152	10090.ENSMUSP00000057983	0	0	0	0	0	0	0	0.645	0.645
Capg	Acta2	2104379	2101808	10090.ENSMUSP00000063389	10090.ENSMUSP00000048218	0	0	0	0	0.067	0.386	0.233	0.288	0.645
Gmps	Slc23a3	2097498	2096889	10090.ENSMUSP00000029405	10090.ENSMUSP00000027405	0.095	0	0	0	0.195	0	0	0.546	0.64
Ifi27l2a	Usp18	2102934	2098409	10090.ENSMUSP00000054698	10090.ENSMUSP00000032198	0	0	0	0	0.548	0	0	0.235	0.639
Stat3	Socs2	2112805	2094793	10090.ENSMUSP00000120152	10090.ENSMUSP00000020215	0	0	0	0	0	0.176	0.212	0.481	0.633
Egfr	Cd40	2094834	2094452	10090.ENSMUSP00000020329	10090.ENSMUSP00000017799	0	0	0	0	0	0	0	0.63	0.63
Stat3	Igf2	2112805	2112474	10090.ENSMUSP00000120152	10090.ENSMUSP00000114076	0	0	0	0	0	0	0	0.629	0.629
Lrp8	Apoe	2110858	2093453	10090.ENSMUSP00000102343	10090.ENSMUSP00000003066	0	0	0	0	0	0.106	0	0.601	0.628
Socs2	Apoe	2094793	2093453	10090.ENSMUSP00000020215	10090.ENSMUSP00000003066	0	0	0	0	0	0	0	0.628	0.628
Egfr	Socs2	2094834	2094793	10090.ENSMUSP00000020329	10090.ENSMUSP00000020215	0	0	0	0	0	0.047	0	0.624	0.627
Col3a1	Loxl1	2107752	2103393	10090.ENSMUSP00000085192	10090.ENSMUSP00000057406	0	0	0	0	0.546	0.101	0	0.155	0.625
Trf	Apoe	2099371	2093453	10090.ENSMUSP00000035158	10090.ENSMUSP00000003066	0	0	0	0	0.402	0	0	0.394	0.622
Isg15	Serpina3g	2107452	2100520	10090.ENSMUSP00000082548	10090.ENSMUSP00000041250	0	0	0	0	0.115	0.537	0	0.146	0.62
Cdkn1a	Egfr	2095964	2094834	10090.ENSMUSP00000023829	10090.ENSMUSP00000020329	0	0	0	0	0	0	0	0.617	0.617
Rasd2	Gpr124	2112692	2098908	10090.ENSMUSP00000118070	10090.ENSMUSP00000033876	0.062	0	0	0	0	0.115	0.058	0.568	0.617
Igf2	Ghr	2112474	2105199	10090.ENSMUSP00000114076	10090.ENSMUSP00000069457	0	0	0	0	0	0	0	0.615	0.615
Rad51l1	Gmps	2106808	2097498	10090.ENSMUSP00000078490	10090.ENSMUSP00000029405	0.113	0	0	0	0.113	0	0	0.546	0.611
Gmps	Cd34	2097498	2094376	10090.ENSMUSP00000029405	10090.ENSMUSP00000016638	0	0	0	0	0	0	0	0.607	0.607
Igf2	Egfr	2112474	2094834	10090.ENSMUSP00000114076	10090.ENSMUSP00000020329	0	0	0	0	0	0	0	0.606	0.606
Thy1	Serpinb1a	2112005	2106305	10090.ENSMUSP00000110489	10090.ENSMUSP00000075690	0	0	0	0	0	0	0	0.604	0.604
Cd24a	Cd34	2103486	2094376	10090.ENSMUSP00000057983	10090.ENSMUSP00000016638	0	0	0	0	0	0	0	0.603	0.603
Thy1	Serpinb9b	2112005	2093801	10090.ENSMUSP00000110489	10090.ENSMUSP00000006392	0	0	0	0	0	0	0	0.603	0.603
Loxl1	Adamts2	2103393	2100319	10090.ENSMUSP00000057406	10090.ENSMUSP00000040171	0	0	0	0	0.572	0	0	0.093	0.596
Acta2	Rhobtb1	2101808	2094765	10090.ENSMUSP00000048218	10090.ENSMUSP00000020101	0	0	0	0	0	0.103	0.168	0.501	0.595
Ptk2b	Socs2	2095565	2094793	10090.ENSMUSP00000022622	10090.ENSMUSP00000020215	0	0	0	0	0.053	0.173	0	0.515	0.587
Ak1	Gmps	2105065	2097498	10090.ENSMUSP00000068479	10090.ENSMUSP00000029405	0	0	0	0	0.12	0	0	0.546	0.584
Rasd2	Gnai1	2112692	2106032	10090.ENSMUSP00000118070	10090.ENSMUSP00000074259	0	0	0	0	0.085	0.167	0.181	0.398	0.574
Gbp2	Isg15	2114300	2107452	10090.ENSMUSP00000132435	10090.ENSMUSP00000082548	0	0	0	0	0.321	0	0	0.398	0.574
F2r	Gnaz	2104103	2099556	10090.ENSMUSP00000061754	10090.ENSMUSP00000036087	0	0	0	0	0	0.087	0.528	0.085	0.571
Il4ra	Cd40	2098646	2094452	10090.ENSMUSP00000033004	10090.ENSMUSP00000017799	0	0	0	0	0.088	0.108	0	0.51	0.567
Stat3	Thy1	2112805	2112005	10090.ENSMUSP00000120152	10090.ENSMUSP00000110489	0	0	0	0	0	0	0.3	0.4	0.562
Stat3	Ptk2b	2112805	2095565	10090.ENSMUSP00000120152	10090.ENSMUSP00000022622	0	0	0	0	0.053	0.143	0.268	0.349	0.561
Gnai1	Rasl11a	2106032	2098259	10090.ENSMUSP00000074259	10090.ENSMUSP00000031646	0	0	0	0	0.05	0.167	0.181	0.398	0.557
Gnaz	Rasl11a	2099556	2098259	10090.ENSMUSP00000036087	10090.ENSMUSP00000031646	0	0	0	0	0.05	0.167	0.181	0.398	0.557
Rasd2	Gnaz	2112692	2099556	10090.ENSMUSP00000118070	10090.ENSMUSP00000036087	0	0	0	0	0.05	0.167	0.181	0.398	0.557
Gpr56	Col3a1	2108436	2107752	10090.ENSMUSP00000090959	10090.ENSMUSP00000085192	0	0	0	0	0.049	0.535	0	0.076	0.556
Gria4	Ptk2b	2096770	2095565	10090.ENSMUSP00000027020	10090.ENSMUSP00000022622	0	0	0	0	0.057	0	0.54	0.058	0.555
Ano1	Gabra3	2112452	2104262	10090.ENSMUSP00000113899	10090.ENSMUSP00000062638	0	0	0	0	0	0	0.54	0.06	0.549
Cd55	Egfr	2096965	2094834	10090.ENSMUSP00000027650	10090.ENSMUSP00000020329	0	0	0	0	0.051	0	0	0.541	0.546
Stat3	Cd34	2112805	2094376	10090.ENSMUSP00000120152	10090.ENSMUSP00000016638	0	0	0	0	0	0	0	0.542	0.542
Cryl1	Sqrdl	2095517	2093754	10090.ENSMUSP00000022517	10090.ENSMUSP00000005953	0	0	0	0	0.061	0	0.484	0.132	0.542
Pmaip1	Cdkn1a	2096282	2095964	10090.ENSMUSP00000025399	10090.ENSMUSP00000023829	0	0	0	0	0	0	0	0.541	0.541
Xdh	Socs2	2096113	2094793	10090.ENSMUSP00000024866	10090.ENSMUSP00000020215	0	0	0	0	0	0	0	0.538	0.538
Egfr	Slc5a1	2094834	2094098	10090.ENSMUSP00000020329	10090.ENSMUSP00000011178	0	0	0	0	0	0.111	0	0.498	0.535
Ccnd1	Agap2	2108527	2100907	10090.ENSMUSP00000091495	10090.ENSMUSP00000043466	0	0	0	0	0	0	0.528	0.056	0.535
Col3a1	Acta2	2107752	2101808	10090.ENSMUSP00000085192	10090.ENSMUSP00000048218	0	0	0	0	0.243	0	0	0.402	0.529
Fhit	Cdkn1a	2112991	2095964	10090.ENSMUSP00000123874	10090.ENSMUSP00000023829	0	0	0	0	0	0	0	0.527	0.527
Gnai1	Gpr124	2106032	2098908	10090.ENSMUSP00000074259	10090.ENSMUSP00000033876	0	0	0	0	0.054	0.133	0	0.47	0.527
Gnaz	Gpr124	2099556	2098908	10090.ENSMUSP00000036087	10090.ENSMUSP00000033876	0	0	0	0	0.049	0.133	0	0.47	0.524
Serpinb1a	Pgr	2106305	2104405	10090.ENSMUSP00000075690	10090.ENSMUSP00000063562	0	0	0	0	0	0.062	0.128	0.463	0.522
Gbp2	Parp10	2114300	2106202	10090.ENSMUSP00000132435	10090.ENSMUSP00000075110	0	0	0	0	0.517	0	0	0	0.517
Slc1a2	Slc5a1	2106927	2094098	10090.ENSMUSP00000079100	10090.ENSMUSP00000011178	0	0	0	0	0	0	0	0.513	0.513
Cd24a	Cd40	2103486	2094452	10090.ENSMUSP00000057983	10090.ENSMUSP00000017799	0	0	0	0	0	0	0	0.51	0.51
Gnai1	Gucy1b3	2106032	2097583	10090.ENSMUSP00000074259	10090.ENSMUSP00000029635	0	0	0	0	0.137	0.312	0.135	0.158	0.51
Ivl	Sprr1a	2103816	2102767	10090.ENSMUSP00000059780	10090.ENSMUSP00000053751	0	0	0	0	0.097	0	0	0.478	0.509
Dpysl5	Slc23a3	2107779	2096889	10090.ENSMUSP00000085400	10090.ENSMUSP00000027405	0.318	0	0	0	0.211	0	0	0.156	0.506
Fam49a	Fam84a	2104680	2095006	10090.ENSMUSP00000065613	10090.ENSMUSP00000020926	0	0	0	0	0.068	0	0	0.491	0.506
Xdh	Apoe	2096113	2093453	10090.ENSMUSP00000024866	10090.ENSMUSP00000003066	0	0	0	0	0.081	0	0	0.485	0.506
Stat3	Ndn	2112805	2101277	10090.ENSMUSP00000120152	10090.ENSMUSP00000045369	0	0	0	0	0.054	0.099	0	0.464	0.503
Irf7	Cd40	2096662	2094452	10090.ENSMUSP00000026571	10090.ENSMUSP00000017799	0	0	0	0	0.139	0	0	0.444	0.5
Rab40b	Acta2	2110780	2101808	10090.ENSMUSP00000101713	10090.ENSMUSP00000048218	0	0	0	0	0.05	0.101	0	0.461	0.499
Egfr	Rhbdl3	2094834	2094456	10090.ENSMUSP00000020329	10090.ENSMUSP00000017836	0	0	0	0	0	0.211	0	0.389	0.497
Tchh	Ivl	2105206	2103816	10090.ENSMUSP00000069525	10090.ENSMUSP00000059780	0	0	0	0	0	0	0	0.495	0.495
Cdkn1a	Ptk2b	2095964	2095565	10090.ENSMUSP00000023829	10090.ENSMUSP00000022622	0	0	0	0	0	0	0	0.495	0.495
Igf2	Cd24a	2112474	2103486	10090.ENSMUSP00000114076	10090.ENSMUSP00000057983	0	0	0	0	0	0	0	0.495	0.495
Parp10	Irgm2	2106202	2103164	10090.ENSMUSP00000075110	10090.ENSMUSP00000056001	0	0	0	0	0.496	0	0	0	0.495
Thbs1	Dpp4	2101178	2101025	10090.ENSMUSP00000044903	10090.ENSMUSP00000044050	0	0	0	0	0.056	0	0	0.485	0.493
Isg15	Rhbdl3	2107452	2094456	10090.ENSMUSP00000082548	10090.ENSMUSP00000017836	0	0	0	0	0.077	0.046	0	0.466	0.488
Pip5k1b	Rhobtb1	2096413	2094765	10090.ENSMUSP00000025800	10090.ENSMUSP00000020101	0	0	0	0	0.049	0.168	0.181	0.303	0.487
Egfr	Cd34	2094834	2094376	10090.ENSMUSP00000020329	10090.ENSMUSP00000016638	0	0	0	0	0	0	0	0.488	0.487
Stat3	Irf7	2112805	2096662	10090.ENSMUSP00000120152	10090.ENSMUSP00000026571	0	0	0	0	0.121	0.099	0	0.404	0.486
Isg15	Irgm2	2107452	2103164	10090.ENSMUSP00000082548	10090.ENSMUSP00000056001	0	0	0	0	0.35	0	0	0.243	0.486
Gnai1	Ptk2b	2106032	2095565	10090.ENSMUSP00000074259	10090.ENSMUSP00000022622	0	0	0	0	0.084	0.074	0.44	0	0.484
Pgr	Serpinb9b	2104405	2093801	10090.ENSMUSP00000063562	10090.ENSMUSP00000006392	0	0	0	0	0	0.062	0.128	0.42	0.484
Coro2b	Megf6	2100626	2098005	10090.ENSMUSP00000041826	10090.ENSMUSP00000030897	0	0	0	0	0.483	0	0	0	0.483
Parp10	Usp18	2106202	2098409	10090.ENSMUSP00000075110	10090.ENSMUSP00000032198	0	0	0	0	0.405	0	0	0.168	0.483
Gnai1	F2r	2106032	2104103	10090.ENSMUSP00000074259	10090.ENSMUSP00000061754	0	0	0	0	0	0.1	0.44	0.056	0.482
Tubb3	Rhbdl3	2105452	2094456	10090.ENSMUSP00000071134	10090.ENSMUSP00000017836	0	0	0	0	0.056	0	0	0.473	0.481
Nrarp	Myl7	2110558	2110449	10090.ENSMUSP00000100615	10090.ENSMUSP00000099985	0	0	0	0	0.049	0.111	0.239	0.287	0.479
Serpinb1a	Egfr	2106305	2094834	10090.ENSMUSP00000075690	10090.ENSMUSP00000020329	0	0	0	0	0	0.062	0	0.468	0.479
Gpr124	Rasl11a	2098908	2098259	10090.ENSMUSP00000033876	10090.ENSMUSP00000031646	0.062	0	0	0	0	0.115	0.058	0.409	0.476
Mylk	Ptk2b	2095867	2095565	10090.ENSMUSP00000023538	10090.ENSMUSP00000022622	0	0	0	0.611	0.051	0	0.428	0.215	0.474
Acta2	Pdgfb	2101808	2093117	10090.ENSMUSP00000048218	10090.ENSMUSP00000000500	0	0	0	0	0	0	0.219	0.348	0.469
Gnai1	Egfr	2106032	2094834	10090.ENSMUSP00000074259	10090.ENSMUSP00000020329	0	0	0	0	0	0.073	0.44	0.058	0.468
Serpinb1a	Loxl1	2106305	2103393	10090.ENSMUSP00000075690	10090.ENSMUSP00000057406	0	0	0	0	0.043	0	0	0.467	0.468
Pgr	Cdkn1a	2104405	2095964	10090.ENSMUSP00000063562	10090.ENSMUSP00000023829	0	0	0	0	0	0.107	0	0.427	0.466
Fam49a	Clip3	2104680	2094184	10090.ENSMUSP00000065613	10090.ENSMUSP00000014065	0	0	0	0	0.094	0	0	0.431	0.463
Acta2	Rasl11a	2101808	2098259	10090.ENSMUSP00000048218	10090.ENSMUSP00000031646	0	0	0	0	0.083	0.103	0.103	0.357	0.462
Gnaz	Gucy1b3	2099556	2097583	10090.ENSMUSP00000036087	10090.ENSMUSP00000029635	0	0	0	0	0.053	0.312	0.135	0.158	0.461
Usp18	Egfr	2098409	2094834	10090.ENSMUSP00000032198	10090.ENSMUSP00000020329	0	0	0	0	0	0.045	0	0.459	0.461
Thbs1	Egfr	2101178	2094834	10090.ENSMUSP00000044903	10090.ENSMUSP00000020329	0	0	0	0	0	0	0	0.461	0.461
Dclk1	Acta2	2102140	2101808	10090.ENSMUSP00000050034	10090.ENSMUSP00000048218	0	0	0	0	0.052	0.059	0	0.444	0.461
Parp10	Irf7	2106202	2096662	10090.ENSMUSP00000075110	10090.ENSMUSP00000026571	0	0	0	0	0.416	0	0	0.11	0.459
Egfr	Krt14	2094834	2093902	10090.ENSMUSP00000020329	10090.ENSMUSP00000007272	0	0	0	0	0	0.053	0	0.449	0.455
Isg15	Hist1h2bc	2107452	2094489	10090.ENSMUSP00000082548	10090.ENSMUSP00000018246	0	0	0	0	0.054	0.102	0	0.41	0.455
Hist1h4i	Isg15	2110478	2107452	10090.ENSMUSP00000100042	10090.ENSMUSP00000082548	0	0	0	0	0.056	0.115	0	0.399	0.454
Car9	Egfr	2097775	2094834	10090.ENSMUSP00000030183	10090.ENSMUSP00000020329	0	0	0	0	0.052	0.046	0	0.443	0.452
Dpp4	Slc5a1	2101025	2094098	10090.ENSMUSP00000044050	10090.ENSMUSP00000011178	0	0	0	0	0.092	0.106	0	0.38	0.452
Igf2	Fgf10	2112474	2095442	10090.ENSMUSP00000114076	10090.ENSMUSP00000022246	0	0	0	0	0	0	0	0.451	0.451
Cd24a	Egfr	2103486	2094834	10090.ENSMUSP00000057983	10090.ENSMUSP00000020329	0	0	0	0	0	0	0	0.446	0.446
Acta2	Chd7	2101808	2100995	10090.ENSMUSP00000048218	10090.ENSMUSP00000043903	0	0	0	0	0.052	0.218	0.139	0.234	0.446
Isg15	Tubb3	2107452	2105452	10090.ENSMUSP00000082548	10090.ENSMUSP00000071134	0	0	0	0	0	0.113	0	0.398	0.443
Clmn	Acta2	2111339	2101808	10090.ENSMUSP00000105563	10090.ENSMUSP00000048218	0	0	0	0	0.054	0.315	0.129	0.131	0.443
Cd40	Apoe	2094452	2093453	10090.ENSMUSP00000017799	10090.ENSMUSP00000003066	0	0	0	0	0	0	0	0.443	0.443
Thbs1	Pdgfb	2101178	2093117	10090.ENSMUSP00000044903	10090.ENSMUSP00000000500	0	0	0	0	0	0.111	0	0.396	0.44
Cd24a	Krt14	2103486	2093902	10090.ENSMUSP00000057983	10090.ENSMUSP00000007272	0	0	0	0	0	0	0	0.44	0.44
Gnai1	Rhobtb1	2106032	2094765	10090.ENSMUSP00000074259	10090.ENSMUSP00000020101	0	0	0	0	0.051	0.148	0.163	0.271	0.44
Gnaz	Rhobtb1	2099556	2094765	10090.ENSMUSP00000036087	10090.ENSMUSP00000020101	0	0	0	0	0.05	0.148	0.163	0.271	0.44
Slc7a3	Gmps	2105910	2097498	10090.ENSMUSP00000073582	10090.ENSMUSP00000029405	0.055	0	0	0	0.053	0	0	0.425	0.44
Tchh	Fgf10	2105206	2095442	10090.ENSMUSP00000069525	10090.ENSMUSP00000022246	0	0	0	0	0	0	0	0.438	0.438
Isg15	Acta2	2107452	2101808	10090.ENSMUSP00000082548	10090.ENSMUSP00000048218	0	0	0	0	0	0.105	0	0.398	0.438
Cp	Xdh	2111084	2096113	10090.ENSMUSP00000103965	10090.ENSMUSP00000024866	0	0	0	0	0.093	0	0	0.405	0.438
Figf	Cd34	2098869	2094376	10090.ENSMUSP00000033751	10090.ENSMUSP00000016638	0	0	0	0	0.086	0	0	0.409	0.437
Rasd2	Acta2	2112692	2101808	10090.ENSMUSP00000118070	10090.ENSMUSP00000048218	0	0	0	0	0	0.103	0.103	0.357	0.437
Rasl11a	Rhobtb1	2098259	2094765	10090.ENSMUSP00000031646	10090.ENSMUSP00000020101	0	0	0	0	0	0.169	0.15	0.263	0.433
Cd55	Cd40	2096965	2094452	10090.ENSMUSP00000027650	10090.ENSMUSP00000017799	0	0	0	0	0	0	0.211	0.311	0.433
Rasd2	Rhobtb1	2112692	2094765	10090.ENSMUSP00000118070	10090.ENSMUSP00000020101	0	0	0	0	0	0.169	0.15	0.263	0.433
Rad51l1	Chd7	2106808	2100995	10090.ENSMUSP00000078490	10090.ENSMUSP00000043903	0	0	0	0	0.053	0.34	0	0.164	0.431
Cfi	Serpinb1a	2106534	2106305	10090.ENSMUSP00000077074	10090.ENSMUSP00000075690	0.083	0	0	0	0.043	0.167	0.121	0.248	0.429
Il4ra	Serpinb9b	2098646	2093801	10090.ENSMUSP00000033004	10090.ENSMUSP00000006392	0	0	0	0	0	0	0	0.426	0.426
Col3a1	Figf	2107752	2098869	10090.ENSMUSP00000085192	10090.ENSMUSP00000033751	0	0	0	0	0.121	0	0.372	0	0.424
Il4ra	Socs2	2098646	2094793	10090.ENSMUSP00000033004	10090.ENSMUSP00000020215	0	0	0	0	0	0.097	0.293	0.17	0.423
Igf2	Pgr	2112474	2104405	10090.ENSMUSP00000114076	10090.ENSMUSP00000063562	0	0	0	0	0	0	0	0.422	0.422
Zfpm2	Acta2	2102361	2101808	10090.ENSMUSP00000051335	10090.ENSMUSP00000048218	0	0	0	0	0.073	0.113	0.069	0.333	0.421
Gbp2	Serpina3g	2114300	2100520	10090.ENSMUSP00000132435	10090.ENSMUSP00000041250	0	0	0	0	0.348	0	0	0.149	0.421
Fgfr2	Egfr	2112234	2094834	10090.ENSMUSP00000112430	10090.ENSMUSP00000020329	0	0	0	0.653	0.051	0.175	0.127	0.654	0.421
Egfr	Serpinb9b	2094834	2093801	10090.ENSMUSP00000020329	10090.ENSMUSP00000006392	0	0	0	0	0	0.062	0	0.408	0.42
Pgr	Krt14	2104405	2093902	10090.ENSMUSP00000063562	10090.ENSMUSP00000007272	0	0	0	0	0	0	0	0.421	0.42
Serpinb1a	Apoe	2106305	2093453	10090.ENSMUSP00000075690	10090.ENSMUSP00000003066	0	0	0	0	0	0	0	0.42	0.42
Cdkn1a	Cd34	2095964	2094376	10090.ENSMUSP00000023829	10090.ENSMUSP00000016638	0	0	0	0	0	0	0	0.42	0.42
Thbs1	Cd34	2101178	2094376	10090.ENSMUSP00000044903	10090.ENSMUSP00000016638	0	0	0	0	0	0	0	0.421	0.42
Fhit	Gmps	2112991	2097498	10090.ENSMUSP00000123874	10090.ENSMUSP00000029405	0.071	0	0	0	0.043	0	0	0.399	0.419
Hist1h4i	Acta2	2110478	2101808	10090.ENSMUSP00000100042	10090.ENSMUSP00000048218	0	0	0	0	0.053	0.115	0	0.361	0.417
Stat3	D8Ertd82e	2112805	2111425	10090.ENSMUSP00000120152	10090.ENSMUSP00000106118	0	0	0	0	0	0	0	0.416	0.416
Dclk1	Spint1	2102140	2097298	10090.ENSMUSP00000050034	10090.ENSMUSP00000028783	0	0	0	0	0	0.402	0	0.063	0.415
Nckap1	Rhobtb1	2097202	2094765	10090.ENSMUSP00000028386	10090.ENSMUSP00000020101	0	0	0	0	0	0.213	0.218	0.127	0.415
Ghr	Egfr	2105199	2094834	10090.ENSMUSP00000069457	10090.ENSMUSP00000020329	0	0	0	0	0.082	0	0	0.389	0.415
Rab40b	Pip5k1b	2110780	2096413	10090.ENSMUSP00000101713	10090.ENSMUSP00000025800	0	0	0	0	0.052	0.169	0	0.318	0.415
Stat3	Serpinb1a	2112805	2106305	10090.ENSMUSP00000120152	10090.ENSMUSP00000075690	0	0	0	0	0	0.062	0	0.402	0.415
Fgf10	Rhbdl3	2095442	2094456	10090.ENSMUSP00000022246	10090.ENSMUSP00000017836	0	0	0	0	0	0.396	0	0.07	0.414
Rad51l1	Dclk1	2106808	2102140	10090.ENSMUSP00000078490	10090.ENSMUSP00000050034	0	0	0	0	0.055	0.341	0	0.132	0.412
Serpinb1a	Il4ra	2106305	2098646	10090.ENSMUSP00000075690	10090.ENSMUSP00000033004	0	0	0	0	0	0	0	0.41	0.41
Acta2	Cd34	2101808	2094376	10090.ENSMUSP00000048218	10090.ENSMUSP00000016638	0	0	0	0	0.054	0	0	0.402	0.41
Lmo7	Rhobtb1	2109908	2094765	10090.ENSMUSP00000097910	10090.ENSMUSP00000020101	0	0	0	0	0.051	0.22	0	0.267	0.41
Pgr	Cyp1b1	2104405	2096123	10090.ENSMUSP00000063562	10090.ENSMUSP00000024894	0	0	0	0	0.049	0.062	0.133	0.325	0.408
Irgm2	Ifi27l2a	2103164	2102934	10090.ENSMUSP00000056001	10090.ENSMUSP00000054698	0	0	0	0	0.315	0	0	0.171	0.408
Nrarp	Ephx1	2110558	2101673	10090.ENSMUSP00000100615	10090.ENSMUSP00000047551	0.046	0	0	0	0.051	0.373	0	0.08	0.407
Pgr	Cd24a	2104405	2103486	10090.ENSMUSP00000063562	10090.ENSMUSP00000057983	0	0	0	0	0	0	0	0.407	0.407
Stat3	Isg15	2112805	2107452	10090.ENSMUSP00000120152	10090.ENSMUSP00000082548	0	0	0	0	0.128	0.047	0	0.341	0.404
Acta2	Zfp521	2101808	2096247	10090.ENSMUSP00000048218	10090.ENSMUSP00000025288	0	0	0	0	0.073	0.113	0.069	0.314	0.404
Zfp791	Acta2	2109378	2101808	10090.ENSMUSP00000096150	10090.ENSMUSP00000048218	0	0	0	0	0.073	0.113	0.069	0.314	0.404
Zfp105	Acta2	2107046	2101808	10090.ENSMUSP00000079840	10090.ENSMUSP00000048218	0	0	0	0	0.073	0.113	0.069	0.314	0.404
Zbtb8b	Acta2	2103525	2101808	10090.ENSMUSP00000058157	10090.ENSMUSP00000048218	0	0	0	0	0.073	0.113	0.069	0.314	0.404
Serpinb1a	Cysltr1	2106305	2104398	10090.ENSMUSP00000075690	10090.ENSMUSP00000063520	0	0	0	0	0	0	0	0.403	0.403
Podxl	Cd34	2096696	2094376	10090.ENSMUSP00000026698	10090.ENSMUSP00000016638	0	0	0	0	0.052	0	0	0.397	0.403
Thbs1	Apoe	2101178	2093453	10090.ENSMUSP00000044903	10090.ENSMUSP00000003066	0	0	0	0	0	0	0	0.403	0.403
Pgr	Chd7	2104405	2100995	10090.ENSMUSP00000063562	10090.ENSMUSP00000043903	0	0	0	0	0.049	0.073	0.209	0.243	0.401
Gmps	Cryl1	2097498	2095517	10090.ENSMUSP00000029405	10090.ENSMUSP00000022517	0.046	0	0	0	0	0	0	0.398	0.401
Acta2	Ptk2b	2101808	2095565	10090.ENSMUSP00000048218	10090.ENSMUSP00000022622	0	0	0	0	0.051	0	0.361	0.09	0.4
Col3a1	Thbs1	2107752	2101178	10090.ENSMUSP00000085192	10090.ENSMUSP00000044903	0	0	0	0	0.101	0.107	0	0.312	0.4

## Sheet: KEGG
Category	Term	Count	%	PValue	Genes	List Total	Pop Hits	Pop Total	Fold Enrichment	Bonferroni	Benjamini	FDR
KEGG_PATHWAY	mmu04151:PI3K-Akt signaling pathway	9	0.192555	1.74987e-05	EGFR, FGFR2, CDKN1A, CCND1, PDGFB, COL3A1, IL4RA, FGF10, THBS1	28	351	7720	7.0696	0.00201034	0.00201034	0.0199306
KEGG_PATHWAY	mmu05218:Melanoma	5	0.106975	9.82594e-05	EGFR, CDKN1A, CCND1, PDGFB, FGF10	28	71	7720	19.4165	0.0112368	0.00563426	0.111868
KEGG_PATHWAY	mmu05215:Prostate cancer	5	0.106975	0.000226436	EGFR, FGFR2, CDKN1A, CCND1, PDGFB	28	88	7720	15.6656	0.0257069	0.00864345	0.257626
KEGG_PATHWAY	mmu05200:Pathways in cancer	8	0.17116	0.000326727	EGFR, FGFR2, CDKN1A, CCND1, PDGFB, GNAI1, FGF10, STAT3	28	397	7720	5.55596	0.0368824	0.00935094	0.371537
KEGG_PATHWAY	mmu05219:Bladder cancer	4	0.0855798	0.000372264	EGFR, CDKN1A, CCND1, THBS1	28	41	7720	26.899	0.0419146	0.0085271	0.42322
KEGG_PATHWAY	mmu05205:Proteoglycans in cancer	6	0.12837	0.000602632	EGFR, CDKN1A, CCND1, IGF2, THBS1, STAT3	28	203	7720	8.14919	0.0669752	0.0114874	0.684301
KEGG_PATHWAY	mmu04015:Rap1 signaling pathway	6	0.12837	0.000766131	EGFR, FGFR2, PDGFB, GNAI1, FGF10, THBS1	28	214	7720	7.73031	0.0843663	0.0125123	0.869221
KEGG_PATHWAY	mmu05214:Glioma	4	0.0855798	0.00144246	EGFR, CDKN1A, CCND1, PDGFB	28	65	7720	16.967	0.152956	0.0205365	1.63082
KEGG_PATHWAY	mmu05161:Hepatitis B	5	0.106975	0.00153562	CDKN1A, CCND1, PTK2B, IRF7, STAT3	28	146	7720	9.44227	0.161995	0.0194453	1.7353
KEGG_PATHWAY	mmu05206:MicroRNAs in cancer	6	0.12837	0.00238106	EGFR, CDKN1A, CCND1, PDGFB, THBS1, STAT3	28	276	7720	5.99379	0.239781	0.0270424	2.67892
KEGG_PATHWAY	mmu04510:Focal adhesion	5	0.106975	0.00543034	EGFR, CCND1, PDGFB, COL3A1, THBS1	28	207	7720	6.65977	0.465375	0.0553364	6.01401
KEGG_PATHWAY	mmu04068:FoxO signaling pathway	4	0.0855798	0.0110311	EGFR, CDKN1A, CCND1, STAT3	28	134	7720	8.23028	0.720745	0.100847	11.8695
KEGG_PATHWAY	mmu05160:Hepatitis C	4	0.0855798	0.011483	EGFR, CDKN1A, IRF7, STAT3	28	136	7720	8.10924	0.735043	0.0971223	12.3271
KEGG_PATHWAY	mmu04630:Jak-STAT signaling pathway	4	0.0855798	0.0136488	CCND1, SOCS2, IL4RA, STAT3	28	145	7720	7.60591	0.794112	0.106749	14.4904
KEGG_PATHWAY	mmu04921:Oxytocin signaling pathway	4	0.0855798	0.0171652	EGFR, CDKN1A, CCND1, GNAI1	28	158	7720	6.98011	0.863459	0.124309	17.8992
KEGG_PATHWAY	mmu05212:Pancreatic cancer	3	0.0641849	0.0213994	EGFR, CCND1, STAT3	28	65	7720	12.7253	0.916894	0.143994	21.8392
KEGG_PATHWAY	mmu04115:p53 signaling pathway	3	0.0641849	0.0226501	CDKN1A, CCND1, THBS1	28	67	7720	12.3454	0.928261	0.14357	22.9696
KEGG_PATHWAY	mmu04917:Prolactin signaling pathway	3	0.0641849	0.0265792	CCND1, SOCS2, STAT3	28	73	7720	11.3307	0.954859	0.158113	26.4243
KEGG_PATHWAY	mmu04640:Hematopoietic cell lineage	3	0.0641849	0.0344398	CD34, IL4RA, CD24A	28	84	7720	9.84694	0.982232	0.191137	32.9151
KEGG_PATHWAY	mmu04540:Gap junction	3	0.0641849	0.0359559	EGFR, PDGFB, GNAI1	28	86	7720	9.61794	0.98517	0.189866	34.1053
KEGG_PATHWAY	mmu04810:Regulation of actin cytoskeleton	4	0.0855798	0.0376689	EGFR, FGFR2, PDGFB, FGF10	28	214	7720	5.15354	0.987913	0.189633	35.4267
KEGG_PATHWAY	mmu04014:Ras signaling pathway	4	0.0855798	0.0446337	EGFR, FGFR2, PDGFB, FGF10	28	229	7720	4.81597	0.994757	0.212333	40.5545
KEGG_PATHWAY	mmu05203:Viral carcinogenesis	4	0.0855798	0.0456085	CDKN1A, CCND1, IRF7, STAT3	28	231	7720	4.77427	0.995338	0.208168	41.2417
KEGG_PATHWAY	mmu04066:HIF-1 signaling pathway	3	0.0641849	0.0507121	EGFR, CDKN1A, STAT3	28	104	7720	7.9533	0.997484	0.220711	44.7231
KEGG_PATHWAY	mmu04060:Cytokine-cytokine receptor interaction	4	0.0855798	0.052731	EGFR, PDGFB, IL4RA, CD40	28	245	7720	4.50146	0.99803	0.22057	46.0474
KEGG_PATHWAY	mmu04010:MAPK signaling pathway	4	0.0855798	0.0570328	EGFR, FGFR2, PDGFB, FGF10	28	253	7720	4.35912	0.998833	0.228748	48.7734
KEGG_PATHWAY	mmu05145:Toxoplasmosis	3	0.0641849	0.0587833	GNAI1, CD40, STAT3	28	113	7720	7.31985	0.999057	0.227431	49.8463
KEGG_PATHWAY	mmu05146:Amoebiasis	3	0.0641849	0.0625065	SERPINB9B, COL3A1, SERPINB1A	28	117	7720	7.0696	0.999402	0.232869	52.0602
KEGG_PATHWAY	mmu04670:Leukocyte transendothelial migration	3	0.0641849	0.0663092	PTK2B, GNAI1, THY1	28	121	7720	6.83589	0.999626	0.238202	54.2292
KEGG_PATHWAY	mmu05166:HTLV-I infection	4	0.0855798	0.0715296	CDKN1A, CCND1, PDGFB, CD40	28	278	7720	3.96711	0.999804	0.247608	57.061
KEGG_PATHWAY	mmu05162:Measles	3	0.0641849	0.0812325	CCND1, IRF7, STAT3	28	136	7720	6.08193	0.999941	0.269694	61.9038

## Sheet: BP
Category	Term	Count	%	PValue	Genes	List Total	Pop Hits	Pop Total	Fold Enrichment	Bonferroni	Benjamini	FDR
GOTERM_BP_DIRECT	GO:0008284~positive regulation of cell proliferation	9	0.192555	4.43379e-06	EGFR, FGFR2, PGR, CCND1, PDGFB, PTK2B, FGF10, THBS1, STAT3	34	542	18082	8.83102	0.00360703	0.00360703	0.00682228
GOTERM_BP_DIRECT	GO:0042832~defense response to protozoan	4	0.0855798	2.17415e-05	IRGM2, IL4RA, CD40, GBP2	34	30	18082	70.9098	0.0175634	0.00882062	0.0334495
GOTERM_BP_DIRECT	GO:2000379~positive regulation of reactive oxygen species metabolic process	4	0.0855798	2.4041e-05	CDKN1A, PDGFB, PTK2B, THBS1	34	31	18082	68.6224	0.0194029	0.00650994	0.0369867
GOTERM_BP_DIRECT	GO:0038001~paracrine signaling	3	0.0641849	3.21888e-05	PGR, PDGFB, CD34	34	5	18082	319.094	0.0258932	0.00653712	0.0495191
GOTERM_BP_DIRECT	GO:0050731~positive regulation of peptidyl-tyrosine phosphorylation	5	0.106975	3.31284e-05	PDGFB, PTK2B, FGF10, IGF2, CD24A	34	101	18082	26.3279	0.0266389	0.00538547	0.0509642
GOTERM_BP_DIRECT	GO:0043410~positive regulation of MAPK cascade	5	0.106975	3.71654e-05	FGFR2, PDGFB, FGF10, IGF2, CD40	34	104	18082	25.5684	0.0298362	0.00503567	0.0571729
GOTERM_BP_DIRECT	GO:0060664~epithelial cell proliferation involved in salivary gland morphogenesis	3	0.0641849	6.74421e-05	FGFR2, PDGFB, FGF10	34	7	18082	227.924	0.0534838	0.00782171	0.103726
GOTERM_BP_DIRECT	GO:0043406~positive regulation of MAP kinase activity	4	0.0855798	0.000128921	EGFR, PDGFB, CD40, CD24A	34	54	18082	39.3943	0.0997454	0.0130488	0.198194
GOTERM_BP_DIRECT	GO:0018108~peptidyl-tyrosine phosphorylation	4	0.0855798	0.000223949	EGFR, FGFR2, PDGFB, PTK2B	34	65	18082	32.7276	0.166848	0.0200778	0.344047
GOTERM_BP_DIRECT	GO:0048146~positive regulation of fibroblast proliferation	4	0.0855798	0.000223949	EGFR, CDKN1A, PDGFB, FGF10	34	65	18082	32.7276	0.166848	0.0200778	0.344047
GOTERM_BP_DIRECT	GO:0051592~response to calcium ion	4	0.0855798	0.000255991	EGFR, CCND1, PTK2B, THBS1	34	68	18082	31.2837	0.188329	0.0206498	0.393182
GOTERM_BP_DIRECT	GO:0060445~branching involved in salivary gland morphogenesis	3	0.0641849	0.000334142	FGFR2, PDGFB, FGF10	34	15	18082	106.365	0.238428	0.024457	0.512927
GOTERM_BP_DIRECT	GO:0042493~response to drug	6	0.12837	0.000346635	CDKN1A, CCND1, PTK2B, IGF2, THBS1, STAT3	34	339	18082	9.41281	0.246146	0.0232713	0.532057
GOTERM_BP_DIRECT	GO:0070374~positive regulation of ERK1 and ERK2 cascade	5	0.106975	0.000365801	EGFR, FGFR2, PDGFB, PTK2B, FGF10	34	188	18082	14.1442	0.257834	0.022676	0.561397
GOTERM_BP_DIRECT	GO:0048661~positive regulation of smooth muscle cell proliferation	4	0.0855798	0.000413464	EGFR, FGFR2, PDGFB, THBS1	34	80	18082	26.5912	0.286122	0.023787	0.634329
GOTERM_BP_DIRECT	GO:0050678~regulation of epithelial cell proliferation	3	0.0641849	0.000431806	FGFR2, PGR, FGF10	34	17	18082	93.8512	0.296718	0.0231933	0.662381
GOTERM_BP_DIRECT	GO:0051897~positive regulation of protein kinase B signaling	4	0.0855798	0.00072649	EGFR, IGF2, THBS1, RASD2	34	97	18082	21.9309	0.446949	0.0363422	1.11206
GOTERM_BP_DIRECT	GO:0032355~response to estradiol	4	0.0855798	0.000817081	CCND1, SOCS2, FGF10, STAT3	34	101	18082	21.0623	0.48634	0.0384299	1.24992
GOTERM_BP_DIRECT	GO:0045944~positive regulation of transcription from RNA polymerase II promoter	8	0.17116	0.00181263	EGFR, FGFR2, PGR, IRF7, FGF10, IGF2, CD40, STAT3	34	995	18082	4.27597	0.772051	0.0788629	2.75311
GOTERM_BP_DIRECT	GO:0048514~blood vessel morphogenesis	3	0.0641849	0.00185075	PDGFB, FGF10, THBS1	34	35	18082	45.5849	0.779036	0.0763859	2.81023
GOTERM_BP_DIRECT	GO:0040014~regulation of multicellular organism growth	3	0.0641849	0.00217922	FGFR2, SOCS2, STAT3	34	38	18082	41.9861	0.831024	0.085063	3.30121
GOTERM_BP_DIRECT	GO:0048565~digestive tract development	3	0.0641849	0.00265686	FGFR2, COL3A1, FGF10	34	42	18082	37.9874	0.88562	0.0980975	4.01103
GOTERM_BP_DIRECT	GO:0045740~positive regulation of DNA replication	3	0.0641849	0.0027833	EGFR, PDGFB, FGF10	34	43	18082	37.104	0.896848	0.0981005	4.1981
GOTERM_BP_DIRECT	GO:0051781~positive regulation of cell division	3	0.0641849	0.00304451	FGFR2, PDGFB, IGF2	34	45	18082	35.4549	0.91668	0.102414	4.58352
GOTERM_BP_DIRECT	GO:0043066~negative regulation of apoptotic process	6	0.12837	0.00339157	EGFR, PGR, CDKN1A, PTK2B, THBS1, STAT3	34	566	18082	5.63771	0.937265	0.108962	5.09336
GOTERM_BP_DIRECT	GO:0048286~lung alveolus development	3	0.0641849	0.00345707	FGFR2, PGR, FGF10	34	48	18082	33.239	0.940537	0.106756	5.18929
GOTERM_BP_DIRECT	GO:0060595~fibroblast growth factor receptor signaling pathway involved in mammary gland specification	2	0.0427899	0.00364681	FGFR2, FGF10	34	2	18082	531.824	0.949084	0.108208	5.46668
GOTERM_BP_DIRECT	GO:0060915~mesenchymal cell differentiation involved in lung development	2	0.0427899	0.00364681	FGFR2, FGF10	34	2	18082	531.824	0.949084	0.108208	5.46668
GOTERM_BP_DIRECT	GO:0060667~branch elongation involved in salivary gland morphogenesis	2	0.0427899	0.00364681	FGFR2, FGF10	34	2	18082	531.824	0.949084	0.108208	5.46668
GOTERM_BP_DIRECT	GO:0060615~mammary gland bud formation	2	0.0427899	0.00364681	FGFR2, FGF10	34	2	18082	531.824	0.949084	0.108208	5.46668
GOTERM_BP_DIRECT	GO:0001934~positive regulation of protein phosphorylation	4	0.0855798	0.00451876	EGFR, CCND1, IGF2, CD40	34	184	18082	11.5614	0.975056	0.127776	6.7317
GOTERM_BP_DIRECT	GO:1901215~negative regulation of neuron death	3	0.0641849	0.00467699	APOE, CD34, STAT3	34	56	18082	28.4905	0.978087	0.127553	6.95956
GOTERM_BP_DIRECT	GO:0008285~negative regulation of cell proliferation	5	0.106975	0.00503626	FGFR2, CDKN1A, PTK2B, FGF10, STAT3	34	384	18082	6.92479	0.983673	0.132287	7.47499
GOTERM_BP_DIRECT	GO:0010628~positive regulation of gene expression	5	0.106975	0.00576242	FGFR2, PDGFB, ACTA2, CD34, STAT3	34	399	18082	6.66446	0.990995	0.145295	8.50865
GOTERM_BP_DIRECT	GO:0009612~response to mechanical stimulus	3	0.0641849	0.00588425	PTK2B, COL3A1, THBS1	34	63	18082	25.3249	0.991851	0.143718	8.681
GOTERM_BP_DIRECT	GO:0030335~positive regulation of cell migration	4	0.0855798	0.00593648	EGFR, PDGFB, PTK2B, THBS1	34	203	18082	10.4793	0.992192	0.140707	8.7548
GOTERM_BP_DIRECT	GO:0071363~cellular response to growth factor stimulus	3	0.0641849	0.00606717	EGFR, PDGFB, THBS1	34	64	18082	24.9292	0.992986	0.139548	8.93921
GOTERM_BP_DIRECT	GO:0007165~signal transduction	8	0.17116	0.00660204	EGFR, GNAZ, RASL11A, PTK2B, CD34, GNAI1, RASD2, STAT3	34	1255	18082	3.39011	0.995477	0.146816	9.69034
GOTERM_BP_DIRECT	GO:0070141~response to UV-A	2	0.0427899	0.00728072	EGFR, CCND1	34	4	18082	265.912	0.997408	0.156468	10.6351
GOTERM_BP_DIRECT	GO:0042127~regulation of cell proliferation	4	0.0855798	0.00807124	EGFR, FGFR2, PTK2B, IL4RA	34	227	18082	9.37134	0.998646	0.167619	11.7238
GOTERM_BP_DIRECT	GO:0043627~response to estrogen	3	0.0641849	0.00824769	CCND1, IL4RA, CD24A	34	75	18082	21.2729	0.998829	0.166753	11.9652
GOTERM_BP_DIRECT	GO:0050679~positive regulation of epithelial cell proliferation	3	0.0641849	0.00846099	EGFR, FGFR2, FGF10	34	76	18082	20.993	0.999017	0.166597	12.2561
GOTERM_BP_DIRECT	GO:0043949~regulation of cAMP-mediated signaling	2	0.0427899	0.00909285	GNAI1, RASD2	34	5	18082	212.729	0.999415	0.173774	13.1125
GOTERM_BP_DIRECT	GO:0060019~radial glial cell differentiation	2	0.0427899	0.00909285	FGF10, STAT3	34	5	18082	212.729	0.999415	0.173774	13.1125
GOTERM_BP_DIRECT	GO:0001525~angiogenesis	4	0.0855798	0.00928798	FGFR2, PTK2B, FGF10, THY1	34	239	18082	8.90081	0.999502	0.173146	13.3754
GOTERM_BP_DIRECT	GO:0071636~positive regulation of transforming growth factor beta production	2	0.0427899	0.0109018	CD34, THBS1	34	6	18082	177.275	0.999868	0.195791	15.5214
GOTERM_BP_DIRECT	GO:0007155~cell adhesion	5	0.106975	0.0113019	PTK2B, CD34, THBS1, CD24A, THY1	34	485	18082	5.48272	0.999905	0.19793	16.0458
GOTERM_BP_DIRECT	GO:0010629~negative regulation of gene expression	4	0.0855798	0.0122771	PGR, CDKN1A, PDGFB, CD34	34	265	18082	8.02752	0.999958	0.208744	17.3109
GOTERM_BP_DIRECT	GO:0010544~negative regulation of platelet activation	2	0.0427899	0.0127075	PDGFB, APOE	34	7	18082	151.95	0.99997	0.210919	17.8637
GOTERM_BP_DIRECT	GO:0032808~lacrimal gland development	2	0.0427899	0.0127075	FGFR2, FGF10	34	7	18082	151.95	0.99997	0.210919	17.8637
GOTERM_BP_DIRECT	GO:0060449~bud elongation involved in lung branching	2	0.0427899	0.0127075	FGFR2, FGF10	34	7	18082	151.95	0.99997	0.210919	17.8637
GOTERM_BP_DIRECT	GO:0060396~growth hormone receptor signaling pathway	2	0.0427899	0.0127075	SOCS2, STAT3	34	7	18082	151.95	0.99997	0.210919	17.8637
GOTERM_BP_DIRECT	GO:0031659~positive regulation of cyclin-dependent protein serine/threonine kinase activity involved in G1/S transition of mitotic cell cycle	2	0.0427899	0.0127075	EGFR, FGF10	34	7	18082	151.95	0.99997	0.210919	17.8637
GOTERM_BP_DIRECT	GO:0042060~wound healing	3	0.0641849	0.0127143	EGFR, COL3A1, FGF10	34	94	18082	16.9731	0.99997	0.206853	17.8724
GOTERM_BP_DIRECT	GO:0030916~otic vesicle formation	2	0.0427899	0.0163094	FGFR2, FGF10	34	9	18082	118.183	0.999998	0.25274	22.3555
GOTERM_BP_DIRECT	GO:0016337~single organismal cell-cell adhesion	3	0.0641849	0.0165427	EGFR, CD34, THY1	34	108	18082	14.7729	0.999999	0.251181	22.6385
GOTERM_BP_DIRECT	GO:0009887~organ morphogenesis	3	0.0641849	0.0168329	FGFR2, FGF10, IGF2	34	109	18082	14.6373	0.999999	0.250419	22.9889
GOTERM_BP_DIRECT	GO:0051726~regulation of cell cycle	3	0.0641849	0.0177164	CDKN1A, CCND1, STAT3	34	112	18082	14.2453	1	0.257188	24.047
GOTERM_BP_DIRECT	GO:0044321~response to leptin	2	0.0427899	0.0181055	CCND1, STAT3	34	10	18082	106.365	1	0.257568	24.5086
GOTERM_BP_DIRECT	GO:0048730~epidermis morphogenesis	2	0.0427899	0.0181055	FGFR2, FGF10	34	10	18082	106.365	1	0.257568	24.5086
GOTERM_BP_DIRECT	GO:0045471~response to ethanol	3	0.0641849	0.019232	CCND1, PTK2B, STAT3	34	117	18082	13.6365	1	0.266794	25.8304
GOTERM_BP_DIRECT	GO:2001223~negative regulation of neuron migration	2	0.0427899	0.0198985	COL3A1, STAT3	34	11	18082	96.6952	1	0.270222	26.6021
GOTERM_BP_DIRECT	GO:0060174~limb bud formation	2	0.0427899	0.0198985	FGFR2, FGF10	34	11	18082	96.6952	1	0.270222	26.6021
GOTERM_BP_DIRECT	GO:0007435~salivary gland morphogenesis	2	0.0427899	0.0198985	EGFR, FGF10	34	11	18082	96.6952	1	0.270222	26.6021
GOTERM_BP_DIRECT	GO:0006468~protein phosphorylation	5	0.106975	0.020061	EGFR, FGFR2, CCND1, PDGFB, PTK2B	34	576	18082	4.61652	1	0.267741	26.7892
GOTERM_BP_DIRECT	GO:0045893~positive regulation of transcription, DNA-templated	5	0.106975	0.020061	PGR, PDGFB, IRF7, FGF10, STAT3	34	576	18082	4.61652	1	0.267741	26.7892
GOTERM_BP_DIRECT	GO:0045766~positive regulation of angiogenesis	3	0.0641849	0.0204826	PTK2B, CD34, THBS1	34	121	18082	13.1857	1	0.268271	27.2724
GOTERM_BP_DIRECT	GO:0030324~lung development	3	0.0641849	0.0214424	EGFR, FGFR2, FGF10	34	124	18082	12.8667	1	0.274717	28.3613
GOTERM_BP_DIRECT	GO:0043537~negative regulation of blood vessel endothelial cell migration	2	0.0427899	0.0234749	APOE, THBS1	34	13	18082	81.819	1	0.292288	30.6169
GOTERM_BP_DIRECT	GO:0030195~negative regulation of blood coagulation	2	0.0427899	0.0234749	APOE, CD34	34	13	18082	81.819	1	0.292288	30.6169
GOTERM_BP_DIRECT	GO:0050921~positive regulation of chemotaxis	2	0.0427899	0.0270387	PDGFB, THBS1	34	15	18082	70.9098	1	0.324247	34.4125
GOTERM_BP_DIRECT	GO:0050673~epithelial cell proliferation	2	0.0427899	0.0270387	FGFR2, FGF10	34	15	18082	70.9098	1	0.324247	34.4125
GOTERM_BP_DIRECT	GO:0032026~response to magnesium ion	2	0.0427899	0.0270387	CCND1, THBS1	34	15	18082	70.9098	1	0.324247	34.4125
GOTERM_BP_DIRECT	GO:0035265~organ growth	2	0.0427899	0.0288158	FGFR2, FGF10	34	16	18082	66.4779	1	0.33692	36.2319
GOTERM_BP_DIRECT	GO:2000353~positive regulation of endothelial cell apoptotic process	2	0.0427899	0.0288158	CD40, THBS1	34	16	18082	66.4779	1	0.33692	36.2319
GOTERM_BP_DIRECT	GO:0002376~immune system process	4	0.0855798	0.0321795	PTK2B, IRF7, IL4RA, CD40	34	383	18082	5.55429	1	0.363533	39.5471
GOTERM_BP_DIRECT	GO:0051000~positive regulation of nitric-oxide synthase activity	2	0.0427899	0.0323607	PTK2B, APOE	34	18	18082	59.0915	1	0.360351	39.7209
GOTERM_BP_DIRECT	GO:2000573~positive regulation of DNA biosynthetic process	2	0.0427899	0.0323607	PDGFB, PTK2B	34	18	18082	59.0915	1	0.360351	39.7209
GOTERM_BP_DIRECT	GO:0043536~positive regulation of blood vessel endothelial cell migration	2	0.0427899	0.0323607	PDGFB, THBS1	34	18	18082	59.0915	1	0.360351	39.7209
GOTERM_BP_DIRECT	GO:0043032~positive regulation of macrophage activation	2	0.0427899	0.0323607	IL4RA, THBS1	34	18	18082	59.0915	1	0.360351	39.7209
GOTERM_BP_DIRECT	GO:0050730~regulation of peptidyl-tyrosine phosphorylation	2	0.0427899	0.0323607	EGFR, PDGFB	34	18	18082	59.0915	1	0.360351	39.7209
GOTERM_BP_DIRECT	GO:0060749~mammary gland alveolus development	2	0.0427899	0.0341284	CCND1, SOCS2	34	19	18082	55.9814	1	0.371199	41.3933
GOTERM_BP_DIRECT	GO:0071157~negative regulation of cell cycle arrest	2	0.0427899	0.0341284	CCND1, FGF10	34	19	18082	55.9814	1	0.371199	41.3933
GOTERM_BP_DIRECT	GO:0048557~embryonic digestive tract morphogenesis	2	0.0427899	0.0376544	FGFR2, FGF10	34	21	18082	50.6499	1	0.396213	44.6004
GOTERM_BP_DIRECT	GO:0051412~response to corticosterone	2	0.0427899	0.0376544	CDKN1A, CCND1	34	21	18082	50.6499	1	0.396213	44.6004
GOTERM_BP_DIRECT	GO:0006970~response to osmotic stress	2	0.0427899	0.0376544	EGFR, PTK2B	34	21	18082	50.6499	1	0.396213	44.6004
GOTERM_BP_DIRECT	GO:0010165~response to X-ray	2	0.0427899	0.0376544	CDKN1A, CCND1	34	21	18082	50.6499	1	0.396213	44.6004
GOTERM_BP_DIRECT	GO:1902895~positive regulation of pri-miRNA transcription from RNA polymerase II promoter	2	0.0427899	0.0394128	PDGFB, STAT3	34	22	18082	48.3476	1	0.405588	46.1377
GOTERM_BP_DIRECT	GO:0008589~regulation of smoothened signaling pathway	2	0.0427899	0.0394128	FGFR2, FGF10	34	22	18082	48.3476	1	0.405588	46.1377
GOTERM_BP_DIRECT	GO:0016064~immunoglobulin mediated immune response	2	0.0427899	0.0394128	IRF7, IL4RA	34	22	18082	48.3476	1	0.405588	46.1377
GOTERM_BP_DIRECT	GO:0007568~aging	3	0.0641849	0.0395876	APOE, COL3A1, STAT3	34	173	18082	9.22237	1	0.402125	46.2883
GOTERM_BP_DIRECT	GO:0048041~focal adhesion assembly	2	0.0427899	0.041168	PTK2B, THY1	34	23	18082	46.2455	1	0.409691	47.6323
GOTERM_BP_DIRECT	GO:0010243~response to organonitrogen compound	2	0.0427899	0.041168	CDKN1A, CCND1	34	23	18082	46.2455	1	0.409691	47.6323
GOTERM_BP_DIRECT	GO:0051968~positive regulation of synaptic transmission, glutamatergic	2	0.0427899	0.0429201	EGFR, PTK2B	34	24	18082	44.3186	1	0.418246	49.0856
GOTERM_BP_DIRECT	GO:0042104~positive regulation of activated T cell proliferation	2	0.0427899	0.0429201	IGF2, CD24A	34	24	18082	44.3186	1	0.418246	49.0856
GOTERM_BP_DIRECT	GO:0060441~epithelial tube branching involved in lung morphogenesis	2	0.0427899	0.0429201	FGFR2, FGF10	34	24	18082	44.3186	1	0.418246	49.0856
GOTERM_BP_DIRECT	GO:0009880~embryonic pattern specification	2	0.0427899	0.0429201	FGFR2, FGF10	34	24	18082	44.3186	1	0.418246	49.0856
GOTERM_BP_DIRECT	GO:0046777~protein autophosphorylation	3	0.0641849	0.043816	EGFR, FGFR2, THY1	34	183	18082	8.71842	1	0.420167	49.8141
GOTERM_BP_DIRECT	GO:0045737~positive regulation of cyclin-dependent protein serine/threonine kinase activity	2	0.0427899	0.0481579	CCND1, PDGFB	34	27	18082	39.3943	1	0.44653	53.2084
GOTERM_BP_DIRECT	GO:0001892~embryonic placenta development	2	0.0427899	0.0498976	EGFR, PDGFB	34	28	18082	37.9874	1	0.453697	54.5072
GOTERM_BP_DIRECT	GO:0045840~positive regulation of mitotic nuclear division	2	0.0427899	0.0516342	PDGFB, IGF2	34	29	18082	36.6775	1	0.460572	55.7701
GOTERM_BP_DIRECT	GO:0097421~liver regeneration	2	0.0427899	0.0516342	EGFR, CCND1	34	29	18082	36.6775	1	0.460572	55.7701
GOTERM_BP_DIRECT	GO:0002040~sprouting angiogenesis	2	0.0427899	0.0516342	PTK2B, THBS1	34	29	18082	36.6775	1	0.460572	55.7701
GOTERM_BP_DIRECT	GO:0001937~negative regulation of endothelial cell proliferation	2	0.0427899	0.0533678	APOE, THBS1	34	30	18082	35.4549	1	0.467171	56.9979
GOTERM_BP_DIRECT	GO:0042327~positive regulation of phosphorylation	2	0.0427899	0.0533678	EGFR, THBS1	34	30	18082	35.4549	1	0.467171	56.9979
GOTERM_BP_DIRECT	GO:0043552~positive regulation of phosphatidylinositol 3-kinase activity	2	0.0427899	0.0550983	PDGFB, PTK2B	34	31	18082	34.3112	1	0.47351	58.1917
GOTERM_BP_DIRECT	GO:0045739~positive regulation of DNA repair	2	0.0427899	0.0550983	EGFR, FGF10	34	31	18082	34.3112	1	0.47351	58.1917
GOTERM_BP_DIRECT	GO:0007188~adenylate cyclase-modulating G-protein coupled receptor signaling pathway	2	0.0427899	0.0602714	GNAZ, GNAI1	34	34	18082	31.2837	1	0.500438	61.5784
GOTERM_BP_DIRECT	GO:0007166~cell surface receptor signaling pathway	3	0.0641849	0.0603268	EGFR, PTK2B, CD24A	34	219	18082	7.28525	1	0.496059	61.6133
GOTERM_BP_DIRECT	GO:0008283~cell proliferation	3	0.0641849	0.0608123	EGFR, CD34, STAT3	34	220	18082	7.25214	1	0.494281	61.9173
GOTERM_BP_DIRECT	GO:0031069~hair follicle morphogenesis	2	0.0427899	0.0619896	FGFR2, FGF10	34	35	18082	30.3899	1	0.496542	62.6453
GOTERM_BP_DIRECT	GO:0045747~positive regulation of Notch signaling pathway	2	0.0427899	0.065417	FGF10, STAT3	34	37	18082	28.7472	1	0.511339	64.6912
GOTERM_BP_DIRECT	GO:0030177~positive regulation of Wnt signaling pathway	2	0.0427899	0.065417	FGFR2, FGF10	34	37	18082	28.7472	1	0.511339	64.6912
GOTERM_BP_DIRECT	GO:0042220~response to cocaine	2	0.0427899	0.0671261	PGR, PTK2B	34	38	18082	27.9907	1	0.516175	65.6718
GOTERM_BP_DIRECT	GO:0007264~small GTPase mediated signal transduction	3	0.0641849	0.0687624	RASL11A, RHOBTB1, RASD2	34	236	18082	6.76047	1	0.520472	66.5867
GOTERM_BP_DIRECT	GO:0014911~positive regulation of smooth muscle cell migration	2	0.0427899	0.0688322	PGR, PDGFB	34	39	18082	27.273	1	0.516416	66.6253
GOTERM_BP_DIRECT	GO:0031397~negative regulation of protein ubiquitination	2	0.0427899	0.0722354	ISG15, RASD2	34	41	18082	25.9426	1	0.529707	68.4536
GOTERM_BP_DIRECT	GO:0035458~cellular response to interferon-beta	2	0.0427899	0.0722354	IRGM2, GBP2	34	41	18082	25.9426	1	0.529707	68.4536
GOTERM_BP_DIRECT	GO:0010595~positive regulation of endothelial cell migration	2	0.0427899	0.0722354	PTK2B, THBS1	34	41	18082	25.9426	1	0.529707	68.4536
GOTERM_BP_DIRECT	GO:0030890~positive regulation of B cell proliferation	2	0.0427899	0.0756264	CDKN1A, CD40	34	43	18082	24.736	1	0.542324	70.182
GOTERM_BP_DIRECT	GO:0008543~fibroblast growth factor receptor signaling pathway	2	0.0427899	0.0756264	FGFR2, FGF10	34	43	18082	24.736	1	0.542324	70.182
GOTERM_BP_DIRECT	GO:0007173~epidermal growth factor receptor signaling pathway	2	0.0427899	0.0790055	EGFR, PTK2B	34	45	18082	23.6366	1	0.554313	71.8158
GOTERM_BP_DIRECT	GO:0045907~positive regulation of vasoconstriction	2	0.0427899	0.0790055	EGFR, PDGFB	34	45	18082	23.6366	1	0.554313	71.8158
GOTERM_BP_DIRECT	GO:0045429~positive regulation of nitric oxide biosynthetic process	2	0.0427899	0.0790055	EGFR, PTK2B	34	45	18082	23.6366	1	0.554313	71.8158
GOTERM_BP_DIRECT	GO:0007595~lactation	2	0.0427899	0.0806905	CCND1, SOCS2	34	46	18082	23.1228	1	0.557929	72.5989
GOTERM_BP_DIRECT	GO:0032870~cellular response to hormone stimulus	2	0.0427899	0.0823725	SOCS2, STAT3	34	47	18082	22.6308	1	0.561432	73.3603
GOTERM_BP_DIRECT	GO:0097190~apoptotic signaling pathway	2	0.0427899	0.0890709	CD40, CD24A	34	51	18082	20.8558	1	0.586909	76.2004
GOTERM_BP_DIRECT	GO:0018149~peptide cross-linking	2	0.0427899	0.0973772	COL3A1, THBS1	34	56	18082	18.9937	1	0.617007	79.3294
GOTERM_BP_DIRECT	GO:0031100~organ regeneration	2	0.0427899	0.0973772	CDKN1A, CCND1	34	56	18082	18.9937	1	0.617007	79.3294
GOTERM_BP_DIRECT	GO:0045727~positive regulation of translation	2	0.0427899	0.0990296	PTK2B, THBS1	34	57	18082	18.6605	1	0.619322	79.9041
GOTERM_BP_DIRECT	GO:0016310~phosphorylation	4	0.0855798	0.0996885	EGFR, FGFR2, PTK2B, STAT3	34	612	18082	3.47597	1	0.617738	80.129

## Sheet: CC
Category	Term	Count	%	PValue	Genes	List Total	Pop Hits	Pop Total	Fold Enrichment	Bonferroni	Benjamini	FDR
GOTERM_CC_DIRECT	GO:0009986~cell surface	10	0.21395	6.42595e-07	EGFR, FGFR2, PDGFB, APOE, CD34, FGF10, CD40, THBS1, CD24A, THY1	34	629	19662	9.19387	6.87553e-05	6.87553e-05	0.000722313
GOTERM_CC_DIRECT	GO:0005615~extracellular space	11	0.235344	0.000120312	SERPINB9B, PDGFB, ACTA2, APOE, COL3A1, IL4RA, SERPINB1A, FGF10, IGF2, CD40, THBS1	34	1504	19662	4.22954	0.0127916	0.00641638	0.135154
GOTERM_CC_DIRECT	GO:0031012~extracellular matrix	6	0.12837	0.000121641	FGFR2, PDGFB, APOE, COL3A1, FGF10, THBS1	34	294	19662	11.8019	0.012932	0.00432939	0.136647
GOTERM_CC_DIRECT	GO:0005576~extracellular region	11	0.235344	0.000422003	FGFR2, ISG15, PDGFB, APOE, CD34, COL3A1, IL4RA, FGF10, IGF2, CD40, THBS1	34	1753	19662	3.62877	0.0441592	0.0112275	0.473333
GOTERM_CC_DIRECT	GO:0045121~membrane raft	5	0.106975	0.000930257	EGFR, PTK2B, GNAI1, CD24A, THY1	34	262	19662	11.0361	0.0947859	0.0197197	1.0407
GOTERM_CC_DIRECT	GO:0030425~dendrite	6	0.12837	0.00125574	GNAZ, PGR, PDGFB, PTK2B, APOE, THY1	34	490	19662	7.08115	0.125803	0.022159	1.40249
GOTERM_CC_DIRECT	GO:0005737~cytoplasm	21	0.449294	0.00140019	FGFR2, EGFR, PDGFB, SOCS2, GNAI1, ACTA2, SERPINB1A, CD40, GMPS, STAT3, PGR, SERPINB9B, CDKN1A, CCND1, ISG15, PTK2B, APOE, CD34, IRF7, THBS1, GBP2	34	6631	19662	1.83142	0.139228	0.0211901	1.56266
GOTERM_CC_DIRECT	GO:0009897~external side of plasma membrane	5	0.106975	0.00187606	CD34, CD40, THBS1, CD24A, THY1	34	317	19662	9.12136	0.182028	0.0248031	2.08866
GOTERM_CC_DIRECT	GO:0044297~cell body	3	0.0641849	0.0126724	GNAZ, PTK2B, ACTA2	34	102	19662	17.0087	0.744521	0.140689	13.3554
GOTERM_CC_DIRECT	GO:0005886~plasma membrane	15	0.320924	0.0197663	FGFR2, GNAZ, EGFR, GNAI1, IL4RA, FGF10, CD40, CD24A, STAT3, THY1, PGR, PTK2B, CD34, APOE, RASD2	34	4874	19662	1.77973	0.881894	0.192342	20.1012
GOTERM_CC_DIRECT	GO:0016020~membrane	19	0.406504	0.0199173	FGFR2, GNAZ, EGFR, IRGM2, PDGFB, GNAI1, IL4RA, SERPINB1A, CD40, CD24A, THY1, CCND1, RASL11A, PTK2B, APOE, CD34, RHBDL3, GBP2, RASD2	34	6998	19662	1.5701	0.883826	0.177739	20.2396
GOTERM_CC_DIRECT	GO:0005829~cytosol	8	0.17116	0.0261739	GNAZ, PGR, CDKN1A, CCND1, APOE, GMPS, STAT3, THY1	34	1784	19662	2.59325	0.941452	0.210608	25.7795
GOTERM_CC_DIRECT	GO:0048471~perinuclear region of cytoplasm	5	0.106975	0.0277193	EGFR, CDKN1A, PTK2B, CD34, GBP2	34	692	19662	4.17843	0.950602	0.206556	27.0927
GOTERM_CC_DIRECT	GO:0031362~anchored component of external side of plasma membrane	2	0.0427899	0.0281636	CD24A, THY1	34	17	19662	68.0346	0.95296	0.196148	27.4663
GOTERM_CC_DIRECT	GO:0000307~cyclin-dependent protein kinase holoenzyme complex	2	0.0427899	0.0330531	CDKN1A, CCND1	34	20	19662	57.8294	0.972579	0.213186	31.4644
GOTERM_CC_DIRECT	GO:0043025~neuronal cell body	4	0.0855798	0.0595737	PDGFB, PTK2B, APOE, CD40	34	534	19662	4.33179	0.998601	0.336854	49.8635
GOTERM_CC_DIRECT	GO:0005834~heterotrimeric G-protein complex	2	0.0427899	0.0618933	GNAZ, GNAI1	34	38	19662	30.4365	0.998926	0.331114	51.2361
GOTERM_CC_DIRECT	GO:0070062~extracellular exosome	9	0.192555	0.0703567	GNAZ, ACTA2, APOE, GNAI1, SERPINB1A, IGF2, CD40, THBS1, THY1	34	2674	19662	1.94639	0.999593	0.351876	55.9591

## Sheet: MF
SampleGroup	GeneRatio	PValue	Count	Description	Genes	List Total	Pop Hits	Pop Total	Fold Enrichment	Bonferroni	Benjamini	FDR
GOTERM_MF_DIRECT	0.449294	5.40442e-06	21	protein binding	FGFR2, EGFR, GNAI1, ACTA2, IL4RA, FGF10, IGF2, CD40, CD24A, STAT3, PGR, SERPINB9B, CCND1, CDKN1A, RASL11A, ISG15, PTK2B, APOE, IRF7, RHOBTB1, THBS1	34	4092	17446	2.6333	0.000772536	0.000772536	0.0064002
GOTERM_MF_DIRECT	0.149765	7.21752e-05	7	GTP binding	GNAZ, IRGM2, RASL11A, GNAI1, RHOBTB1, GBP2, RASD2	34	383	17446	9.37813	0.0102683	0.00514742	0.0854427
GOTERM_MF_DIRECT	0.12837	0.000718974	6	enzyme binding	EGFR, PGR, CCND1, PTK2B, CD40, THY1	34	384	17446	8.01746	0.097738	0.0337024	0.848161
GOTERM_MF_DIRECT	0.0855798	0.000879947	4	integrin binding	EGFR, COL3A1, THBS1, THY1	34	100	17446	20.5247	0.118286	0.0309819	1.03715
GOTERM_MF_DIRECT	0.12837	0.00124354	6	protein kinase binding	EGFR, CCND1, ACTA2, CD24A, STAT3, THY1	34	434	17446	7.09379	0.163005	0.0349616	1.46282
GOTERM_MF_DIRECT	0.235344	0.00231516	11	nucleotide binding	EGFR, FGFR2, GNAZ, RASL11A, PTK2B, ACTA2, GNAI1, RHOBTB1, GMPS, GBP2, RASD2	34	1936	17446	2.91544	0.282119	0.0537437	2.70766
GOTERM_MF_DIRECT	0.0855798	0.00286688	4	heparin binding	FGFR2, APOE, FGF10, THBS1	34	151	17446	13.5925	0.336717	0.0569636	3.34294
GOTERM_MF_DIRECT	0.0855798	0.007097	4	GTPase activity	GNAZ, IRGM2, GNAI1, GBP2	34	209	17446	9.82043	0.63886	0.11954	8.08891
GOTERM_MF_DIRECT	0.106975	0.00729867	5	receptor binding	EGFR, PDGFB, PTK2B, APOE, FGF10	34	412	17446	6.22716	0.6492	0.109875	8.30976
GOTERM_MF_DIRECT	0.0427899	0.00754541	2	G-protein coupled serotonin receptor binding	GNAZ, GNAI1	34	4	17446	256.559	0.661451	0.102649	8.57929
GOTERM_MF_DIRECT	0.0641849	0.0218957	3	protein tyrosine kinase activity	EGFR, FGFR2, PTK2B	34	121	17446	12.7219	0.957822	0.250093	23.0634
GOTERM_MF_DIRECT	0.0427899	0.022471	2	platelet-derived growth factor binding	PDGFB, COL3A1	34	12	17446	85.5196	0.961226	0.237256	23.5976
GOTERM_MF_DIRECT	0.0427899	0.0243213	2	insulin-like growth factor receptor binding	SOCS2, IGF2	34	13	17446	78.9412	0.970428	0.237262	25.2928
GOTERM_MF_DIRECT	0.0641849	0.0306156	3	growth factor activity	PDGFB, FGF10, IGF2	34	145	17446	10.6162	0.98828	0.272108	30.8051
GOTERM_MF_DIRECT	0.106975	0.0328792	5	signal transducer activity	EGFR, GNAZ, PTK2B, GNAI1, STAT3	34	648	17446	3.95924	0.99161	0.272919	32.6945
GOTERM_MF_DIRECT	0.0427899	0.033522	2	guanyl nucleotide binding	GNAZ, GNAI1	34	18	17446	57.0131	0.992371	0.262685	33.2225
GOTERM_MF_DIRECT	0.0427899	0.0462619	2	G-protein beta/gamma-subunit complex binding	GNAZ, GNAI1	34	25	17446	41.0494	0.998856	0.328629	42.9334
GOTERM_MF_DIRECT	0.0427899	0.0462619	2	chemoattractant activity	PDGFB, FGF10	34	25	17446	41.0494	0.998856	0.328629	42.9334
GOTERM_MF_DIRECT	0.0427899	0.0480685	2	fibroblast growth factor binding	FGFR2, THBS1	34	26	17446	39.4706	0.999128	0.323864	44.2006
GOTERM_MF_DIRECT	0.0427899	0.0659533	2	RNA polymerase II transcription factor activity, ligand-activated sequence-specific DNA binding	PGR, STAT3	34	36	17446	28.5065	0.999942	0.40161	55.4263
GOTERM_MF_DIRECT	0.0855798	0.0780589	4	protein kinase activity	EGFR, FGFR2, CCND1, PTK2B	34	531	17446	3.86529	0.999991	0.440722	61.807
GOTERM_MF_DIRECT	0.0427899	0.0973282	2	transmembrane receptor protein tyrosine kinase activity	EGFR, FGFR2	34	54	17446	19.0044	1	0.502057	70.2597

## Sheet: data of figure1
colony formation rate in soft ager
	mean	SD	n
MOSE-I	0	0	3	>9999	<0.0001
MOSE-II	10.525	0.4931	3
colony formation rate
MOSE-I	4.47	0.503322	3	10.26	0.0005
MOSE-II	11.26	1.03	3
colony formation diameter
	mean	SD	n
MOSE-I	1.597	0.74417	18	8.816	<0.0001
MOSE-II	5.35	1.5229	10
